# Supplementary material
Source: PubMed Central journal article supplement (PMC9067111)
Supplement: NIHMS1761299-supplement-supplementary_materials.pdf [file NIHMS1761299-supplement-supplementary_materials.pdf]

# Supplementary materials for: Analysis of “Learn-As-You-Go” Studies

Daniel Nevo, Judith J. Lok and Donna Spiegelman

## 1 Description of what is included in the supplementary materials

This document complements the paper by Nevo, Lok and Spiegelman. In Section 2 we prove that the estimator solving Equation (2.3) in the main paper is a partial maximum likelihood estimator. In Section 3, we outline how to generalize the proofs of Theorems 2.1 and 2.2 to a general number of stages  $K$ . In Section 4, we show that the proposed confidence bands for the success probabilities have a simultaneous asymptotic coverage rate of at least 95%. In Section 5.1, we describe the function  $g$  that was used in the simulation study to choose the stage-2 recommended interventions  $\mathbf{X}_j^{(2,n_1)}$  based on the stage 1 data and the cost function. In Section 5.2.1, we present additional simulation results. In Section 6, we present confidence bands for the probability of oxytocin administration based on the BetterBirth data analysis.

## 2 The proposed estimator is a maximum partial likelihood estimator

The probability function of the entire data is  $Pr(\bar{\mathbf{Y}}^{(1)}, \bar{\mathbf{X}}^{(2,n_1)}, \bar{\mathbf{A}}^{(2,n_1)}, \bar{\mathbf{Y}}^{(2,n_1)} | \bar{\mathbf{z}}^{(1)}, \bar{\mathbf{x}}^{(1)}, \bar{\mathbf{a}}^{(1)}, \bar{\mathbf{z}}^{(2)})$ , and can be decomposed in the following way:

$$\begin{aligned} & Pr(\bar{\mathbf{Y}}^{(1)}, \bar{\mathbf{X}}^{(2,n_1)}, \bar{\mathbf{A}}^{(2,n_1)}, \bar{\mathbf{Y}}^{(2,n_1)} | \bar{\mathbf{z}}^{(1)}, \bar{\mathbf{x}}^{(1)}, \bar{\mathbf{a}}^{(1)}, \bar{\mathbf{z}}^{(2)}) \\ &= Pr(\bar{\mathbf{Y}}^{(1)} | \bar{\mathbf{z}}^{(1)}, \bar{\mathbf{x}}^{(1)}, \bar{\mathbf{a}}^{(1)}, \bar{\mathbf{z}}^{(2)}) \times Pr(\bar{\mathbf{X}}^{(2,n_1)} | \bar{\mathbf{Y}}^{(1)}, \bar{\mathbf{z}}^{(1)}, \bar{\mathbf{x}}^{(1)}, \bar{\mathbf{a}}^{(1)}, \bar{\mathbf{z}}^{(2)}) \\ &\times Pr(\bar{\mathbf{A}}^{(2,n_1)} | \bar{\mathbf{Y}}^{(1)}, \bar{\mathbf{X}}^{(2,n_1)}, \bar{\mathbf{z}}^{(1)}, \bar{\mathbf{x}}^{(1)}, \bar{\mathbf{a}}^{(1)}, \bar{\mathbf{z}}^{(2)}) \times Pr(\bar{\mathbf{Y}}^{(2,n_1)} | \bar{\mathbf{Y}}^{(1)}, \bar{\mathbf{A}}^{(2,n_1)}, \bar{\mathbf{X}}^{(2,n_1)}, \bar{\mathbf{z}}^{(1)}, \bar{\mathbf{x}}^{(1)}, \bar{\mathbf{a}}^{(1)}, \bar{\mathbf{z}}^{(2)}) \end{aligned} \quad (\text{A1})$$

$$\begin{aligned} &= Pr(\bar{\mathbf{Y}}^{(1)} | \bar{\mathbf{z}}^{(1)}, \bar{\mathbf{a}}^{(1)}, ) Pr(\bar{\mathbf{X}}^{(2,n_1)} | \bar{\mathbf{Y}}^{(1)}, \bar{\mathbf{z}}^{(1)}, \bar{\mathbf{x}}^{(1)}, \bar{\mathbf{a}}^{(1)}, \bar{\mathbf{z}}^{(2)}) \times Pr(\bar{\mathbf{A}}^{(2,n_1)} | \bar{\mathbf{X}}^{(2,n_1)}) \\ &\times Pr(\bar{\mathbf{Y}}^{(2,n_1)} | \bar{\mathbf{A}}^{(2,n_1)}, \bar{\mathbf{z}}^{(2)}) \end{aligned} \quad (\text{A2})$$

$$\begin{aligned} &= \left[ \prod_{j=1}^{J_1} Pr(\mathbf{Y}_j^{(1)} | \mathbf{z}_j^{(1)}, \mathbf{a}_j^{(1)}) \right] \times \left[ \prod_{j=1}^{J_2} Pr(\mathbf{X}_j^{(2,n_1)} | \bar{\mathbf{Y}}^{(1)}, \bar{\mathbf{z}}^{(1)}, \bar{\mathbf{a}}^{(1)}, \mathbf{z}_j^{(2)}) \right] \\ &\times \left[ \prod_{j=1}^{J_2} Pr(\mathbf{A}_j^{(2,n_1)} | \mathbf{X}_j^{(2,n_1)}) \right] \times \left[ \prod_{j=1}^{J_2} Pr(\mathbf{Y}_j^{(2,n_1)} | \mathbf{A}_j^{(2,n_1)}, \mathbf{z}_j^{(2)}) \right] \end{aligned} \quad (\text{A3})$$

$$= \left[ \prod_{j=1}^{J_1} Pr(\mathbf{Y}_j^{(1)} | \mathbf{z}_j^{(1)}, \mathbf{a}_j^{(1)}) \right] \times \left[ \prod_{j=1}^{J_2} Pr(\mathbf{Y}_j^{(2,n_1)} | \mathbf{A}_j^{(2,n_1)}, \mathbf{z}_j^{(2)}) \right] \quad (\text{A4})$$

$$\begin{aligned} &= \left[ \prod_{j=1}^{J_1} \prod_{i=1}^{n_{j1}} (p_{\mathbf{a}_j^{(1)}}(\boldsymbol{\beta}; \mathbf{z}_j^{(1)})^{Y_{ij}^{(1)}} (1 - p_{\mathbf{a}_j^{(1)}}(\boldsymbol{\beta}; \mathbf{z}_j^{(1)})^{1 - Y_{ij}^{(1)}}) \right] \\ &\times \left[ \prod_{j=1}^{J_2} \prod_{i=1}^{n_{j2}} (p_{\mathbf{A}_j^{(2,n_1)}}(\boldsymbol{\beta}; \mathbf{z}_j^{(2)})^{Y_{ij}^{(2,n_1)}} (1 - p_{\mathbf{A}_j^{(2,n_1)}}(\boldsymbol{\beta}; \mathbf{z}_j^{(2)})^{1 - Y_{ij}^{(2,n_1)}}) \right]. \end{aligned}$$

In (A1), the joint distribution is decomposed. In (A2), we use Assumption 2.1 and the assumption that given  $\mathbf{A}$ ,  $\mathbf{Y}$  and  $\mathbf{X}$  are independent. (A3) is justified by the assumption of independence between centers. (A4) is justified by the deterministic dependence of  $\mathbf{X}_j^{(2,n_1)}$  on the stage 1 data and  $\mathbf{z}_j^{(2)}$ , so  $Pr(\mathbf{X}_j^{(2,n_1)} | \bar{\mathbf{Y}}^{(1)}, \bar{\mathbf{a}}^{(1)}, \bar{\mathbf{z}}^{(1)}, \mathbf{z}_j^{(2)}) = 1$ , and by the assumption that  $Pr(\mathbf{A}_j^{(2,n_1)} | \mathbf{X}_j^{(2,n_1)}) = 1$  since  $\mathbf{A}_j^{(2,n_1)} = h_j^{(1)}(\mathbf{X}_j^{(2,n_1)})$ ,  $h$  is a deterministic function.

Therefore, a partial likelihood for  $\beta$  is

$$L(\beta) = \left[ \prod_{j=1}^{J_1} \prod_{i=1}^{n_{j1}} (p_{\mathbf{a}_j^{(1)}}(\beta; \mathbf{z}_j^{(1)})^{Y_{ij}^{(1)}} (1 - p_{\mathbf{a}_j^{(1)}}(\beta; \mathbf{z}_j^{(1)})^{1 - Y_{ij}^{(1)}}) \right] \\ \times \left[ \prod_{j=1}^{J_2} \prod_{i=1}^{n_{j2}} (p_{\mathbf{A}_j^{(2,n_1)}}(\beta; \mathbf{z}_j^{(2)})^{Y_{ij}^{(2,n_1)}} (1 - p_{\mathbf{A}_j^{(2,n_1)}}(\beta; \mathbf{z}_j^{(2)})^{1 - Y_{ij}^{(2,n_1)}}) \right].$$

By taking derivatives with respect to  $\beta$ , it can be seen that maximizing  $L(\beta)$  is equivalent to solving  $U(\beta)=0$ , with  $U(\beta)$  defined by Equation (2.3) in the main text.

### 3 Extension to a general number of stages

In this section, we consider the case of  $K$  stages, with  $K \geq 3$ . We start with adjusting the notation from a two-stage LAGO design to a  $K$ -stage LAGO design. The notation for stage 1 is the same as in the main text. Let  $J_k$  number of centers at stage  $k$ , and let  $\mathbf{z}_j^{(k)}$  be the center-specific characteristics in center  $j$  of stage  $k$ . Similar to the definitions in the main text, let  $\mathbf{X}_j^{(k, \bar{n}_{k-1})}$ ,  $j' = 1, \dots, J_k$ , be the recommended intervention in center  $j$  of stage  $k$ .  $\mathbf{X}_j^{(k, \bar{n}_{k-1})}$  is chosen according to functions  $g_k$  of the entire data up to stage  $k-1$ , including the stage  $k-1$  data. The actual intervention in center  $j$  of stage  $k$  is  $\mathbf{A}_j^{(k, \bar{n}_{k-1})} = h_j^{(k)}(\mathbf{X}_j^{(k, \bar{n}_{k-1})})$ , where  $h_j^{(k)}$  is a deterministic center-specific continuous function from  $\mathcal{X}$  to  $\mathcal{X}$  that describes how center  $j$  of stage  $k$  decides on the intervention based on the recommendation  $\mathbf{X}_j^{(k, \bar{n}_{k-1})}$ .

Once the recommended intervention  $\mathbf{X}_j^{(k, \bar{n}_{k-1})}$  is determined, stage  $k$  outcomes are collected under the intervention value  $\mathbf{A}_j^{(k, \bar{n}_{k-1})}$ . Let  $\mathbf{Y}_j^{(k, \bar{n}_{k-1})} = (Y_{1j}^{(k, \bar{n}_{k-1})}, \dots, Y_{n_{kj}j}^{(k, \bar{n}_{k-1})})$  be the vector of outcomes in center  $j$  of stage  $k$ . Let  $\bar{\mathbf{X}}^{(k, \bar{n}_{k-1})} = (\mathbf{x}^{(1)}, \mathbf{X}^{(2, n_1)}, \dots, \mathbf{X}^{(k, \bar{n}_{k-1})})$ ,  $\bar{\mathbf{A}}^{(k, \bar{n}_{k-1})} = (\mathbf{a}^{(1)}, \mathbf{A}^{(2, n_1)}, \dots, \mathbf{A}^{(k, \bar{n}_{k-1})})$  and  $\bar{\mathbf{Y}}^{(k, \bar{n}_{k-1})} = (\mathbf{Y}^{(1)}, \dots, \mathbf{Y}^{(k, \bar{n}_{k-1})})$  be the recommended interventions, actual interventions and outcomes until stage  $k$ , respectively. We assume that conditionally on the stage  $k$  actual interventions,  $(\bar{\mathbf{A}}^{(k, \bar{n}_{k-1})}, \bar{\mathbf{Y}}^{(k, \bar{n}_{k-1})})$  are independent of  $\bar{\mathbf{X}}^{(k, \bar{n}_{k-1})}$  and the data from previous stages. Similar to the case of  $K = 2$ , we assume the distribution of  $\bar{\mathbf{Y}}^{(k, \bar{n}_{k-1})}$  follows the logistic regression model (1) given in the main paper.

The two main assumptions in the main text are adjusted for general number of stages  $K > 2$ , in the following way:

**Assumption A1** *Conditionally on  $\bar{\mathbf{X}}^{(2, n_1)}$ ,  $(\bar{\mathbf{A}}^{(2, n_1)}, \bar{\mathbf{Y}}^{(2, n_1)})$  are independent of the stage 1 data  $(\bar{\mathbf{a}}^{(1)}, \bar{\mathbf{Y}}^{(1)})$ .*

**Assumption A2** *For all  $k = 3, \dots, K$ , conditionally on  $\bar{\mathbf{X}}^{(k, \bar{n}_{k-1})}$ ,  $(\bar{\mathbf{A}}^{(k, \bar{n}_{k-1})}, \bar{\mathbf{Y}}^{(k, \bar{n}_{k-1})})$  are independent of the data from the first  $k-1$  stages,  $(\bar{\mathbf{A}}^{(k-1, \bar{n}_{k-2})}, \bar{\mathbf{Y}}^{(k-1, \bar{n}_{k-2})})$ .*

**Assumption A3** *For all  $j = 1, \dots, J_k$  and  $k = 1, \dots, K$ , the recommended intervention in center  $j$  of stage  $k$ ,  $\mathbf{X}_j^{(k, \bar{n}_{k-1})}$ , converges in probability to a center-specific limit  $\mathbf{x}_j^{(k)}$ .*

Assumption A1 is identical to Assumption 2.1 in the paper. Assumption A2 extends Assumption 2.1 in the paper for later stages. This is done because the stage 1 intervention  $\mathbf{a}^{(1)}$  is nonrandom. Assumption A3 extends Assumption 2.2 in the main text to the scenario with  $K > 2$  stages.

Let  $\mathbf{a}_j^{(k)} = h_j^{(k)}(\mathbf{x}_j^{(k)})$  be the probability limit of  $\mathbf{A}_j^{(k, \bar{n}_{k-1})}$ . We now outline the adjustments needed in the proofs presented in Appendices A.1 and A.2 of the main paper to extend the results

to a general number of stages  $K$ . Consistency can be proved as before in the following way. The score function for  $K$  stages has expectation zero at the true  $\beta^*$  by considering terms for the different stages separately. Covariances between terms for stage  $k$  and  $k'$  are again 0, as can be seen by conditioning on the intervention at stage  $\max(k, k')$ . Consistency then follows as for the case with 2 stages.

For asymptotic normality, by arguments similar to those in the proof of Theorem 2.2, we obtain that the asymptotic distribution of  $\sqrt{n}(\hat{\beta} - \beta^*)$  is the same as the asymptotic distribution of the  $K$ -stages analogue of Equation (2.5) in the main text, i.e.,

$$[I(\beta^*)]^{-1} \frac{1}{\sqrt{n}} \left[ \sum_{j=1}^{J_1} \sum_{i=1}^{n_{j1}} \begin{pmatrix} 1 \\ \mathbf{a}_j^{(1)} \\ \mathbf{z}_j^{(1)} \end{pmatrix} \left( Y_{ij}^{(1)} - p_{\mathbf{a}_j^{(1)}}(\beta^*; \mathbf{z}_j^{(1)}) \right) + \sum_{k=2}^K \sum_{j=1}^{J_2} \sum_{i=1}^{n_{jk}} \begin{pmatrix} 1 \\ \mathbf{A}_j^{(k, \bar{n}_{k-1})} \\ \mathbf{z}_j^{(k)} \end{pmatrix} \left( Y_{ij}^{(k, \bar{n}_{k-1})} - p_{\mathbf{A}_j^{(k, \bar{n}_{k-1})}}(\beta^*; \mathbf{z}_j^{(k)}) \right) \right], \quad (\text{A5})$$

where  $I(\beta^*)$  is redefined for a general number of stages.

The appropriate adjustment of the coupling argument uses backward induction, as follows. First, we couple the stage  $K$  outcomes with outcomes  $\mathbf{Y}_j^{(K)}$  had stage  $K$  center  $j$  had an actual intervention  $\mathbf{a}_j^{(K)}$ , resulting in  $\tilde{\mathbf{Y}}_j^{(K, \bar{n}_{K-1})}$  as in Equations (2.6) and (A.14) in the main text, with 2 replaced by  $K$ . As in the coupling for stage 2 outcomes in the  $K = 2$  scenario, replacing  $\mathbf{Y}_j^{(K, \bar{n}_{K-1})}$  by  $\tilde{\mathbf{Y}}_j^{(K, \bar{n}_{K-1})}$  does not change the distribution of the resulting expression. The difference between the resulting expression with  $\tilde{\mathbf{Y}}_j^{(K, \bar{n}_{K-1})}$  and  $\mathbf{A}_j^{(K, \bar{n}_{K-1})}$  and the same expression with  $\mathbf{Y}_j^{(K)}$  and  $\mathbf{a}_j^{(K)}$  converges in probability to zero, as for stage 2 before, since  $\mathbf{A}_j^{(K, \bar{n}_{K-1})} \xrightarrow{P} \mathbf{a}_j^{(K)}$ . Thus, we can replace the  $\tilde{\mathbf{Y}}_j^{(K, \bar{n}_{K-1})}$  by  $\mathbf{Y}_j^{(K)}$  and  $\mathbf{A}_j^{(K, \bar{n}_{K-1})}$  by  $\mathbf{a}_j^{(K)}$  without changing the asymptotic distribution. The resulting stage  $K$  term is independent of all other terms. Then, we can continue with the term for stage  $K - 1$  and use backward induction to show that a similar replacement can be done for all stages. Upon replacing in (A5) all  $\mathbf{Y}_j^{(k, \bar{n}_{k-1})}$  by  $\mathbf{Y}_j^{(k)}$  and all  $\mathbf{A}_j^{(k, \bar{n}_{k-1})}$  by  $\mathbf{a}_j^{(k)}$  ( $j_1, \dots, J_k$  and  $k = 2, \dots, K$ ), the resulting expression is a sum of  $K$  independent terms, and classical logistic regression theory leads to the result of Theorem 2.2.

## 4 Confidence bands for the success probabilities

Our proposed procedure is similar to the one described by Scheffé (1959), and uses our asymptotic normality results about  $\beta$ . We construct confidence bands for  $p_{\mathbf{x}}(\beta; \tilde{\mathbf{z}})$ , for all  $\mathbf{x} \in \mathcal{X}$  and for a fixed  $\mathbf{z} = \tilde{\mathbf{z}}$ . Consider confidence bands of the form

$$Pr[CB_{p_{\mathbf{x}}} \ni p_{\mathbf{x}}(\beta^*; \tilde{\mathbf{z}}), \text{ for all } \mathbf{x} \in \mathcal{X}] = 1 - \alpha.$$

Since

$$Pr[CB_{p_{\mathbf{x}}} \ni p_{\mathbf{x}}(\beta^*; \tilde{\mathbf{z}})] = Pr[\text{logit } CB_{p_{\mathbf{x}}} \ni \text{logit } p_{\mathbf{x}}(\beta^*; \tilde{\mathbf{z}})] = Pr[\text{logit } CB_{p_{\mathbf{x}}} \ni (\beta_0^* + \mathbf{x}^T \beta_1^* + \tilde{\mathbf{z}}^T \beta_2^*)],$$

we can construct confidence bands for  $\beta_0^* + \beta_1^{*T} \mathbf{x} + \beta_2^{*T} \tilde{\mathbf{z}}$  (for all  $\mathbf{x} \in \mathcal{X}$ ), denoted by  $CB_{\mathbf{x}}$ , and obtain confidence bands for  $p_{\mathbf{x}}$  by setting  $CB_{p_{\mathbf{x}}} = \text{expit}(CB_{\mathbf{x}})$ . To this end, we will find  $C_{\alpha}(\mathbf{x})$  such that

$$Pr \left[ [(\hat{\beta}_0 - \beta_0^*) + (\hat{\beta}_1 - \beta_1^*)^T \mathbf{x} + (\hat{\beta}_2 - \beta_2^*)^T \tilde{\mathbf{z}}]^2 \leq C_{\alpha}(\mathbf{x}), \text{ for all } \mathbf{x} \in \mathcal{X} \right] = 1 - \alpha.$$

A special case that is convenient to work with is

$$\begin{aligned} 1 - \alpha &= Pr \left[ \frac{[(\hat{\beta}_0 - \beta_0^*) + (\hat{\beta}_1 - \beta_1^*)^T \mathbf{x} + (\hat{\beta}_2 - \beta_2^*)^T \tilde{\mathbf{z}}]^2}{(1 \ \mathbf{x}^T \ \tilde{\mathbf{z}}^T) I^{-1}(\beta^*) (1 \ \mathbf{x}^T \ \tilde{\mathbf{z}}^T)^T} \leq \tilde{C}_{\alpha}, \text{ for all } \mathbf{x} \in \mathcal{X} \right] \\ &= Pr \left[ \max_{\mathbf{x} \in \mathcal{X}} \left\{ \frac{[(\hat{\beta}_0 - \beta_0^*) + (\hat{\beta}_1 - \beta_1^*)^T \mathbf{x} + (\hat{\beta}_2 - \beta_2^*)^T \tilde{\mathbf{z}}]^2}{(1 \ \mathbf{x}^T \ \tilde{\mathbf{z}}^T) I^{-1}(\beta^*) (1 \ \mathbf{x}^T \ \tilde{\mathbf{z}}^T)^T} \right\} \leq \tilde{C}_{\alpha} \right]. \end{aligned}$$

Now, by setting  $\mathbf{u} = I^{-1/2}(\boldsymbol{\beta}^*)(1 \mathbf{x}^T \tilde{\mathbf{z}}^T)^T$ ,

$$\max_{\mathbf{x} \in \tilde{\mathcal{X}}} \left\{ \frac{[(\hat{\beta}_0 - \beta_0^*) + (\hat{\boldsymbol{\beta}}_1 - \boldsymbol{\beta}_1^*)^T \mathbf{x} + (\hat{\boldsymbol{\beta}}_2 - \boldsymbol{\beta}_2^*)^T \tilde{\mathbf{z}}]^2}{(1 \mathbf{x}^T \tilde{\mathbf{z}}^T) I^{-1}(\boldsymbol{\beta}^*)(1 \mathbf{x}^T \tilde{\mathbf{z}}^T)^T} \right\} = \max_{\mathbf{u} \in \tilde{\mathcal{X}}} \left\{ \frac{[(\hat{\boldsymbol{\beta}} - \boldsymbol{\beta}^*)^T I^{1/2}(\boldsymbol{\beta}^*) \mathbf{u}]^2}{\mathbf{u}^T \mathbf{u}} \right\}, \quad (\text{A6})$$

where  $\tilde{\mathcal{X}}$  is obtained by mapping each point  $\mathbf{x} \in \mathcal{X}$  to  $\mathbf{u} = I^{-1/2}(\boldsymbol{\beta}^*)(1 \mathbf{x}^T \tilde{\mathbf{z}}^T)^T$ . By the Cauchy–Schwarz inequality, the maximum in the right hand side of (A6) is lower or equal of the term when taking  $\mathbf{u} = I^{-1/2}(\boldsymbol{\beta}^*)(\hat{\boldsymbol{\beta}} - \boldsymbol{\beta}^*)$ . That is,

$$\max_{\mathbf{u} \in \tilde{\mathcal{X}}} \left\{ \frac{[(\hat{\boldsymbol{\beta}} - \boldsymbol{\beta}^*)^T I^{1/2}(\boldsymbol{\beta}^*) \mathbf{u}]^2}{\mathbf{u}^T \mathbf{u}} \right\} \leq \|(\hat{\boldsymbol{\beta}} - \boldsymbol{\beta}^*)^T I^{1/2}(\boldsymbol{\beta}^*)\|^2 = (\hat{\boldsymbol{\beta}} - \boldsymbol{\beta}^*)^T I(\boldsymbol{\beta}^*)(\hat{\boldsymbol{\beta}} - \boldsymbol{\beta}^*)$$

which, when multiplied by  $n$ , has an asymptotic Chi-square distribution with  $p + q + 1$  degrees of freedom by the asymptotic normality we proved in Theorem 2.2. Thus,  $\tilde{C}_\alpha = n^{-1} \chi_{(1-\alpha, p+q+1)}^2$ , where  $\chi_{(1-\alpha, p+q+1)}^2$  is the  $1 - \alpha$  quantile of Chi-square distribution with  $p + q + 1$  degrees of freedom. We conclude that conservative 95% confidence bands for logit  $p_{\mathbf{x}}(\boldsymbol{\beta}^*; \tilde{\mathbf{z}})$  are given by

$$CB_{\mathbf{x}} = \left[ (1 \mathbf{x}^T \tilde{\mathbf{z}}^T) \hat{\boldsymbol{\beta}} - \sqrt{\chi_{0.95, p+q+1}^2} \sigma(\hat{\boldsymbol{\beta}}; \mathbf{x}, \tilde{\mathbf{z}}), \quad (1 \mathbf{x}^T \tilde{\mathbf{z}}^T) \hat{\boldsymbol{\beta}} + \sqrt{\chi_{0.95, p+q+1}^2} \sigma(\hat{\boldsymbol{\beta}}; \mathbf{x}, \tilde{\mathbf{z}}) \right],$$

with  $\sigma^2(\hat{\boldsymbol{\beta}}; \mathbf{x}, \tilde{\mathbf{z}}) = (1 \mathbf{x}^T \tilde{\mathbf{z}}^T) n^{-1} \hat{I}^{-1}(\hat{\boldsymbol{\beta}}) (1 \mathbf{x}^T \tilde{\mathbf{z}}^T)^T$  and  $\chi_{0.95, p+q+1}^2$  being the 95% quantile of a  $\chi_{p+q+1}^2$  distribution.

## 5 Additional information on the simulation study

In this section, we present further details about and results from the simulation study. In Section 5.1, we present the function  $g$  we used in the simulations to decide on the stage 2 recommended interventions  $\mathbf{X}_j^{(2, n_1)}$  based on the stage 1 data. In Section 5.2, we present additional simulation results.

### 5.1 Determination of the recommended intervention in the simulation study

We present the function we used in the simulation study to determine the stage 2 recommended intervention. The simulation study did not have an intercept  $\beta_0$ . Consider a center with a center-specific covariate  $z_j^{(2)} = \tilde{z}$  (in the simulations  $z$  is a single center characteristic). Let  $\hat{\boldsymbol{\beta}}^{(1)} = (\hat{\beta}_{11}^{(1)}, \hat{\beta}_{12}^{(1)}, \hat{\beta}_2^{(1)})$  be the stage 1 estimator of  $\boldsymbol{\beta}$ , where  $\hat{\beta}_{11}^{(1)}$  and  $\hat{\beta}_{12}^{(1)}$  are the estimated individual component effects of the intervention and  $\hat{\beta}_2^{(1)}$  is the estimated effect of  $z$ .

First, we check whether the target value  $\tilde{p}$  can be reached for center  $j$  with  $z_j^{(2)} = \tilde{z}$ , using the estimated  $\hat{\boldsymbol{\beta}}^{(1)}$ . For example, if  $\hat{\beta}_{11}^{(1)}$  and  $\hat{\beta}_{12}^{(1)}$  are positive, we check if

$$\hat{\beta}_{11}^{(1)} \mathcal{U}_1 + \hat{\beta}_{12}^{(1)} \mathcal{U}_2 + \hat{\beta}_2^{(1)} \tilde{z} \geq \text{logit}(\tilde{p}), \quad (\text{A7})$$

where  $\mathcal{U}_1$  and  $\mathcal{U}_2$  are the upper values of the intervention  $\mathbf{X}$  as described in Section 2.1 of the main text. If there exists a solution to the optimization problem given by Equation (2.2) in the main text, with  $\boldsymbol{\beta}$  replaced by  $\hat{\boldsymbol{\beta}}^{(1)}$ , we set  $\mathbf{X}_j^{(2, n_1)} = \hat{\mathbf{x}}_j^{opt, (2, n_1)}$  where  $\hat{\mathbf{x}}_j^{opt, (2, n_1)}$  is the estimated optimal intervention based on the stage 1 data and obtained as described in Sections 2.1 and 2.5 of the main text.

However, if (7) is not satisfied, this means that  $\tilde{p}$  cannot be reached under the currently estimated  $\hat{\boldsymbol{\beta}}^{(1)}$  vector. Thus a more careful choice of  $\mathbf{X}_j^{(2, n_1)}$  is needed. Let  $\tilde{X}_{11}$  be the solution of (now  $\hat{\beta}_{11}^{(1)}$  is fixed)

$$\hat{\beta}_{11}^{(1)} \tilde{X}_{11} + I\{\hat{\beta}_{12}^{(1)} > 0\} \hat{\beta}_{12}^{(1)} \mathcal{U}_2 + I\{\hat{\beta}_{12}^{(1)} < 0\} \hat{\beta}_{12}^{(1)} \mathcal{L}_2 + \hat{\beta}_2^{(1)} \tilde{z} = \text{logit}(\tilde{p}).$$

That is,  $\tilde{X}_{11}$  is the value of the first component of the package such that  $\tilde{p}$  is achieved, regardless of the constraint that  $X_1 \in [\mathcal{L}_1, \mathcal{U}_1]$ . The dashed blue line in Figure 1 shows  $\tilde{X}_{j1}$ . However, since values

larger than  $\mathcal{U}_1$  are impossible or unfeasible to implement (we are not allowed to set  $\mathbf{X}_{j_1}^{(2,n_1)} > \mathcal{U}_1$ ),  $\tilde{X}_{11}$  is of a little interest for small values of  $\hat{\beta}_{11}^{(1)}$ . Instead, we use  $g(\hat{\beta})$ , which we now describe;  $g(\hat{\beta})$  is depicted by the red straight line in Figure 1.

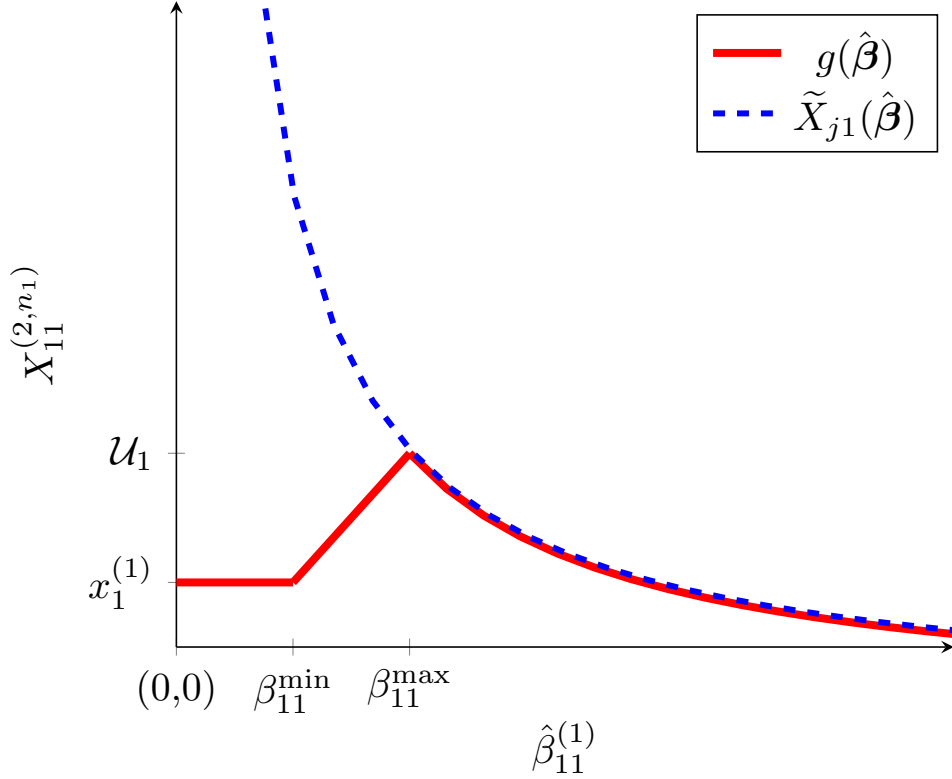

Figure 1: Illustration of the function  $g$  used in the simulation studies to choose  $\mathbf{X}^{(2,n_1)}$ . The x-axis depicts possible values of  $\hat{\beta}_{11}$  and the y-axis depict the values of the first component of the recommended intervention in stage 2. The dashed blue line is the value of the optimal intervention, based on the stage 1 estimator, if the first package component was not bounded by  $\mathcal{U}_1$ . The solid red line is the function we used in the simulations to choose the stage 2 recommended intervention. For simplicity of presentation, the figure presents settings with  $\hat{\beta}_{11}^{(1)}/c_1 > \hat{\beta}_{12}^{(1)}/c_2$ . The figure assumes that the lower bound of  $X_1$  equals  $\mathcal{L}_1 = 0$ .

The function  $g(\hat{\beta})$  we have used in the simulation study to decide on the stage 2 recommended intervention when there is no solution to the optimization problem works on each component of the intervention package separately, while the other component is held fixed at its maximal value if its effect estimate is positive and at its minimal value if its estimated effect is negative. The procedure is illustrated in Figure 1. Let  $\beta_{11}^{\max}$  be the solution of

$$\beta_{11}^{\max} \mathcal{U}_1 + I\{\hat{\beta}_{12}^{(1)} > 0\} \hat{\beta}_{12}^{(1)} \mathcal{U}_2 + I\{\hat{\beta}_{12}^{(1)} < 0\} \hat{\beta}_{12}^{(1)} \mathcal{L}_2 + \hat{\beta}_2^{(1)} \tilde{z} = \text{logit}(\tilde{p}).$$

Because there is no solution to the optimization problem,  $\beta_{11}^{\max} < \hat{\beta}_{11}^{(1)}$ . Let  $\beta_{11}^{\min}$  be some value lower than  $\beta_{11}^{\max}$ ; we took  $\beta_{11}^{\min} = \beta_{11}^{\max}/2$ . Recall that  $\mathbf{x}^{(1)}$  is the pre-specified stage 1 recommended intervention. Set the first component of  $\mathbf{X}_j^{(2,n_1)}$ ,  $X_{j_1}^{(2,n_1)}$ , to

$$X_{j_1}^{(2,n_1)} = \begin{cases} x_1^{(1)} & \text{if } \hat{\beta}_{11}^{(1)} \leq \beta_{11}^{\min} \\ x_1^{(1)} + \frac{\mathcal{U}_1 - x_1^{(1)}}{\beta_{11}^{\max} - \beta_{11}^{\min}} (\hat{\beta}_{11}^{(1)} - \beta_{11}^{\min}) & \text{if } \beta_{11}^{\min} < \hat{\beta}_{11}^{(1)} \leq \beta_{11}^{\max}. \end{cases}$$

In words, keep  $X_1^{(2,n_1)} = x_1^{(1)}$  if  $\hat{\beta}_{11}^{(1)}$  is very small, assuming that either this component is ineffective or that more data are needed. As  $\hat{\beta}_{11}^{(1)}$  increases, we increase  $X_{j_1}^{(2,n_1)}$ . This also ensures that this stage 2 recommended intervention  $X_{j_1}^{(2,n_1)}$  is continuous in  $\hat{\beta}_{11}^{(1)}$ , as needed for Assumption 2.2 to hold.

The procedure described above is repeated for the second component of the intervention (now fixing the first intervention component at its minimal or maximal value). The procedure of choosing the stage 2 recommended intervention  $\mathbf{X}_j^{(2,n_1)}$  is for each value of the stage 2 centers, based on their center characteristics  $\tilde{z}_j^{(2)}$ .

## 5.2 Additional simulation results

In this section, we present the following results:

- A summary of the results from Scenario 3.
- In Table A1, we summarize the results for  $\hat{\beta}$  under the null of no intervention effect. In addition to bias (times 1000) and ratio between mean estimated standard error and empirical standard deviation, Table A1 gives the proportion of times the null  $H_0 : \beta_1 = 0$  in model (1) of the main paper was rejected ( $\hat{\alpha}_\beta$ ) and the proportion of times the null  $H_0 : \gamma = 0$  in the model  $\text{logit } \tilde{p}_Q(\beta, \gamma; \mathbf{z}) = \beta_0 + \beta_2^T \mathbf{z} + \gamma Q$ , where  $Q$  is a group indicator that equals one for the intervention group and zero for the control, was rejected. When the number of centers was small (three in each arm), the standard error was underestimated. The type I error was generally close to the desired 0.05 level and was between 0.04 and 0.06 as expected given the number of simulation iterations (2000).
- Tables A2, A3 and A4 are extended versions of Tables 1, 2 and 3 in the main paper, presenting the results of more simulation scenarios.
- Table A5 presents the mean estimated success probability of the estimated optimal intervention package, the mean true success probability of the estimated optimal intervention and the mean estimated success probability of the true optimal intervention. In all simulation scenarios, All these mean probabilities were very close to the desired 90% ( $\tilde{p}$ ).
- Tables A6 and A7 are the analogues of Tables 2 and 3 in the main paper and Tables A3 and A4 in this document, when changing the cost function as follows. For the second component of the intervention, the unit cost in Table A6 is  $c_2 = 6$  instead of  $c_2 = 8$ , while keeping  $c_1 = 1$ . In the case of  $c_2 = 6$ ,  $\beta_{11}/c_1$  and  $\beta_{12}/c_1$  are closer to each other, and the finite sample bias is larger than when  $c_2 = 8$ . However, as can be seen from Table A6, the bias was greatly reduced when the per-center sample size or the number of centers were larger.
- Tables A8 and A9 are the analogues of Tables 2 and 3 in the main paper and Tables A3 and A4 in this document, when changing the cost function as follows. Tables A8 and A9 consider a non-linear cost function for the intervention. As an example, we considered  $C(\mathbf{x}) = x_1 + 5x_2 + 3\exp(-0.5x_2)$ . That is, the cost is linear in the first components, and has a diminishing marginal cost for the second component. In this case, as can be seen from Tables A8 and A9, the optimal intervention is not necessarily on the boundary. The bias in the estimation of the optimal intervention was not too large, and was further reduced as the sample size and number of centers increased. The empirical coverage of the confidence set  $CS(\mathbf{x}^{opt})$  was slightly lower than the expected 95%.

### 5.2.1 Scenario 3 simulation results

As written in the main text, data were simulated 2000 times mimicking the three stages of the BetterBirth study. True coefficient values were taken from the last column of Table 4 in the main text. That is,  $\beta_{11} = 1.03$  for launch duration,  $\beta_{12} = 0.026$  for each coaching visit,  $\beta_0 = -2.3$  as the intercept, and  $\beta_2 = 0.66$  as the coefficient for mean birth volume. The % relative bias of the two estimated coefficient effects  $\hat{\beta}$  in each stage were 18.4% and -77.3% after stage 1, 2.3% and -50.9% after stage 2, and -0.2% and -7.4% for the final estimators. The observed relative biases in the final stages were comparable with the relative bias reported in Table A.2. The first and second stage bias were larger in absolute value.

The optimal intervention package for a center with average birth volume ( $z = 1.75$ ) was a launch duration of 2.78 days and 1 coaching visit  $\mathbf{x}^{opt} = (2.78, 1)$ . In the 2000 simulation iterations, the mean stage 2 recommended intervention was (2.21, 2.93), the mean stage 3 recommended intervention was (2.64, 1.37), and the mean final estimated optimal intervention after all three stages was (2.78, 1), practically the same as the true optimal intervention. If only combinations of discrete values within  $\mathcal{X}$  are allowed, that is 1, ..., 40 for coaching visits and 1, 1.5, 2, 2.5, ..., 5 for duration of intervention launch, then the optimal intervention is launch duration of three days with one coaching visit,  $\mathbf{x}_{disc}^{opt} = (3, 1)$ . In the 2000 simulation iterations, the mean stage 2 recommended discrete intervention was (2.31, 3.10), the mean stage 3 recommended discrete intervention was (2.84, 1.60), and the mean final estimated optimal discrete intervention after all three stages was (3.001, 1.01), practically the same as the true optimal intervention. The overall conclusion from simulation scenario 3 was the LAGO would perform well under settings similar to the BetterBirth study.



Table A1: Simulation study results under the null  $\beta_1 = 0$ . Unit costs were  $c_1 = 1$  and  $c_2 = 8$ . Results presented are bias times 1000, mean estimated standard error to empirical standard deviation ratio (times 100) and type I error using tests for  $H_0 : \beta_1 = 0$  ( $\alpha_\beta$ ) and for  $H_0 : \gamma = 0$  ( $\alpha_\gamma$ ).

| $n_{1j}$                             | $n_{2j}$ | $J$ | Bias<br>( $\times 1000$ ) | $\hat{\beta}_{11}$<br>SE/EMP.SD | Bias<br>( $\times 1000$ ) | $\hat{\beta}_{12}$<br>SE/EMP.SD | $\hat{\alpha}_\beta$ | $\hat{\alpha}_\gamma$ |
|--------------------------------------|----------|-----|---------------------------|---------------------------------|---------------------------|---------------------------------|----------------------|-----------------------|
| Scenario 1 ( $J_1 = J_2 = J$ )       |          |     |                           |                                 |                           |                                 |                      |                       |
| 50                                   | 100      | 6   | -10.4                     | 89.2                            | -16.5                     | 93.6                            | 3.9                  | 4.9                   |
|                                      |          | 10  | -6.2                      | 98.4                            | -13.0                     | 101.0                           | 4.6                  | 5.1                   |
|                                      |          | 20  | -5.0                      | 100.0                           | -6.8                      | 102.9                           | 4.5                  | 5.4                   |
|                                      | 200      | 6   | -6.4                      | 74.2                            | -18.5                     | 87.3                            | 5.3                  | 4.9                   |
|                                      |          | 10  | -6.2                      | 98.3                            | -11.5                     | 96.1                            | 4.2                  | 5.5                   |
|                                      |          | 20  | -6.9                      | 98.6                            | -6.1                      | 98.5                            | 5.1                  | 4.7                   |
|                                      | 500      | 6   | -13.3                     | 79.7                            | -13.4                     | 89.5                            | 5.5                  | 5.3                   |
|                                      |          | 10  | -6.2                      | 92.0                            | -9.9                      | 91.0                            | 4.8                  | 5.1                   |
|                                      |          | 20  | -4.6                      | 95.9                            | -5.1                      | 94.5                            | 4.9                  | 5.1                   |
|                                      | 1000     | 6   | -13.3                     | 80.5                            | -9.4                      | 85.7                            | 4.8                  | 5.0                   |
|                                      |          | 10  | -6.4                      | 92.1                            | -6.7                      | 89.3                            | 4.2                  | 4.0                   |
|                                      |          | 20  | -3.2                      | 91.0                            | -3.4                      | 94.0                            | 5.0                  | 5.6                   |
| 100                                  | 100      | 6   | -19.0                     | 30.3                            | 3.2                       | 14.7                            | 4.5                  | 5.9                   |
|                                      |          | 10  | -10.2                     | 96.3                            | -4.0                      | 95.4                            | 5.6                  | 5.4                   |
|                                      |          | 20  | -3.9                      | 100.7                           | -5.1                      | 101.7                           | 4.7                  | 4.2                   |
|                                      | 200      | 6   | -7.2                      | 87.7                            | -7.5                      | 92.7                            | 5.3                  | 4.7                   |
|                                      |          | 10  | -6.2                      | 93.5                            | -9.1                      | 93.3                            | 5.0                  | 5.0                   |
|                                      |          | 20  | -4.3                      | 101.2                           | -5.8                      | 97.6                            | 5.7                  | 5.8                   |
|                                      | 500      | 6   | -9.3                      | 84.8                            | -10.2                     | 92.0                            | 4.0                  | 4.7                   |
|                                      |          | 10  | -6.2                      | 96.4                            | -6.0                      | 93.1                            | 4.9                  | 5.0                   |
|                                      |          | 20  | -4.6                      | 96.6                            | -4.0                      | 98.9                            | 5.0                  | 4.5                   |
|                                      | 1000     | 6   | -7.0                      | 86.9                            | -7.4                      | 88.6                            | 5.2                  | 5.0                   |
|                                      |          | 10  | -4.5                      | 93.8                            | -6.0                      | 95.6                            | 4.2                  | 5.4                   |
|                                      |          | 20  | -2.9                      | 94.9                            | -4.3                      | 96.4                            | 5.4                  | 5.1                   |
| 200                                  | 100      | 6   | -6.9                      | 89.0                            | -7.9                      | 91.4                            | 4.5                  | 4.6                   |
|                                      |          | 10  | -4.9                      | 98.2                            | -4.5                      | 96.9                            | 4.9                  | 4.9                   |
|                                      |          | 20  | -2.1                      | 101.4                           | -3.0                      | 98.6                            | 5.2                  | 4.8                   |
|                                      | 200      | 6   | -9.8                      | 92.1                            | -4.6                      | 93.6                            | 4.3                  | 4.8                   |
|                                      |          | 10  | -4.0                      | 103.1                           | -4.8                      | 99.5                            | 3.9                  | 4.9                   |
|                                      |          | 20  | -2.9                      | 104.3                           | -3.8                      | 101.7                           | 4.6                  | 4.4                   |
|                                      | 500      | 6   | -10.0                     | 47.1                            | -6.2                      | 46.6                            | 5.0                  | 5.1                   |
|                                      |          | 10  | -4.1                      | 90.9                            | -5.6                      | 98.1                            | 4.9                  | 4.4                   |
|                                      |          | 20  | -3.1                      | 101.7                           | -3.0                      | 101.7                           | 4.2                  | 5.0                   |
|                                      | 1000     | 6   | -3.9                      | 91.1                            | -6.5                      | 85.4                            | 5.1                  | 4.8                   |
|                                      |          | 10  | -6.0                      | 93.6                            | -3.3                      | 92.7                            | 4.2                  | 4.7                   |
|                                      |          | 20  | -2.5                      | 103.7                           | -3.2                      | 100.2                           | 4.3                  | 4.9                   |
| Scenario 2a ( $J_1 = 6, J_2 = 12$ )  |          |     |                           |                                 |                           |                                 |                      |                       |
| 50                                   | 200      |     | -3.1                      | 94.6                            | -11.0                     | 93.8                            | 4.9                  | 4.7                   |
| Scenario 2b ( $J_1 = 10, J_2 = 20$ ) |          |     |                           |                                 |                           |                                 |                      |                       |
| 50                                   | 200      |     | -7.4                      | 94.7                            | -9.1                      | 93.2                            | 5.1                  | 5.4                   |

Bias, mean bias  $\hat{\beta} - \beta^*$ ; SE, mean estimated standard error; EMP.SD, empirical standard deviation; CP95, empirical coverage rate of 95% confidence intervals.

Table A2: Extended version of Table 1 in the main paper. Simulation study results for individual package component effects. Unit costs were  $c_1 = 1$  and  $c_2 = 8$ . Results include for each individual component estimator bias (times 1000), ratio between mean estimated standard error and empirical standard deviation (times 100) and coverage rate of 95% confidence interval.

| $\exp(\beta^*)$                | $n_{1j}$ | $n_{2j}$ | $J$  | Bias<br>( $\times 1000$ ) | $\hat{\beta}_{11}$<br>SE/EMP.SD | CP95  | Bias<br>( $\times 1000$ ) | $\hat{\beta}_{12}$<br>SE/EMP.SD | CP95  |      |      |
|--------------------------------|----------|----------|------|---------------------------|---------------------------------|-------|---------------------------|---------------------------------|-------|------|------|
| Scenario 1 ( $J_1 = J_2 = J$ ) |          |          |      |                           |                                 |       |                           |                                 |       |      |      |
| (1, 1.2)                       | 50       | 100      | 6    | -3.0                      | 91.1                            | 95.4  | -17.3                     | 74.6                            | 95.0  |      |      |
|                                |          |          | 10   | 0.0                       | 103.0                           | 96.5  | -12.1                     | 92.2                            | 95.2  |      |      |
|                                |          |          | 20   | -2.8                      | 99.7                            | 95.3  | -6.2                      | 96.6                            | 95.4  |      |      |
|                                |          |          | 200  | 6                         | -4.9                            | 93.7  | 95.8                      | -14.3                           | 76.3  | 94.7 |      |
|                                |          |          |      | 10                        | -1.7                            | 94.6  | 94.4                      | -10.2                           | 87.2  | 94.4 |      |
|                                |          |          |      | 20                        | -5.2                            | 96.8  | 94.3                      | -3.1                            | 94.5  | 94.8 |      |
|                                |          | 500      | 6    | -10.0                     | 84.9                            | 96.5  | -11.2                     | 61.3                            | 95.2  |      |      |
|                                |          |          | 10   | -7.1                      | 96.5                            | 95.3  | -4.9                      | 86.9                            | 94.6  |      |      |
|                                |          |          | 20   | -4.4                      | 97.5                            | 95.2  | -1.6                      | 98.8                            | 95.8  |      |      |
|                                |          |          | 1000 | 6                         | -3.9                            | 76.7  | 95.6                      | -8.9                            | 76.5  | 95.0 |      |
|                                |          |          |      | 10                        | -7.0                            | 92.2  | 94.4                      | -3.2                            | 80.2  | 94.3 |      |
|                                |          |          |      | 20                        | -3.5                            | 94.0  | 94.7                      | -1.2                            | 91.3  | 95.0 |      |
|                                |          | 100      | 100  | 6                         | 0.6                             | 94.0  | 94.2                      | -13.4                           | 88.5  | 95.5 |      |
|                                |          |          |      | 10                        | 1.0                             | 98.8  | 94.8                      | -9.0                            | 92.8  | 94.8 |      |
|                                |          |          |      | 20                        | -4.0                            | 97.4  | 94.1                      | -3.2                            | 98.1  | 95.0 |      |
|                                |          |          |      | 200                       | 6                               | -6.8  | 90.4                      | 96.1                            | -10.3 | 85.0 | 95.1 |
|                                |          |          |      |                           | 10                              | -5.0  | 98.8                      | 95.4                            | -5.8  | 93.4 | 96.0 |
|                                |          |          |      |                           | 20                              | -1.7  | 99.0                      | 94.8                            | -3.1  | 99.7 | 95.5 |
|                                |          |          | 500  | 6                         | -8.6                            | 82.1  | 94.1                      | -9.0                            | 77.5  | 94.4 |      |
|                                |          |          |      | 10                        | -3.6                            | 94.5  | 94.9                      | -4.9                            | 84.2  | 94.8 |      |
|                                |          |          |      | 20                        | -3.7                            | 94.9  | 94.0                      | -1.8                            | 95.1  | 94.0 |      |
|                                |          |          |      | 1000                      | 6                               | -3.6  | 86.6                      | 95.2                            | -8.0  | 77.6 | 94.2 |
|                                |          |          |      |                           | 10                              | -4.3  | 93.2                      | 95.3                            | -3.5  | 84.3 | 95.8 |
|                                |          |          |      |                           | 20                              | -3.6  | 98.3                      | 94.7                            | -0.8  | 97.6 | 95.5 |
|                                | 200      |          | 100  | 6                         | 2.8                             | 93.4  | 95.0                      | -9.7                            | 92.8  | 95.5 |      |
|                                |          |          |      | 10                        | -2.4                            | 100.8 | 96.0                      | -3.2                            | 101.0 | 95.9 |      |
|                                |          |          |      | 20                        | -0.8                            | 99.3  | 94.7                      | -1.9                            | 101.2 | 95.7 |      |
|                                |          |          |      | 200                       | 6                               | -2.5  | 90.4                      | 94.7                            | -9.7  | 87.8 | 95.0 |
|                                |          |          |      |                           | 10                              | -1.5  | 100.1                     | 95.2                            | -4.2  | 98.8 | 95.2 |
|                                |          |          |      |                           | 20                              | -0.9  | 98.5                      | 94.7                            | -1.2  | 98.4 | 94.7 |
|                                |          |          | 500  | 6                         | -2.0                            | 92.5  | 94.7                      | -6.8                            | 86.3  | 94.6 |      |
|                                |          |          |      | 10                        | -4.3                            | 96.7  | 94.8                      | -2.4                            | 94.5  | 95.8 |      |
|                                |          |          |      | 20                        | -2.4                            | 98.6  | 95.0                      | -1.5                            | 98.0  | 94.6 |      |
|                                |          |          |      | 1000                      | 6                               | -4.4  | 86.6                      | 95.1                            | -5.3  | 77.8 | 94.5 |
|                                |          |          |      |                           | 10                              | -0.9  | 95.0                      | 95.0                            | -2.8  | 91.4 | 95.3 |
|                                |          |          |      |                           | 20                              | -3.8  | 93.9                      | 94.0                            | -0.1  | 99.6 | 94.7 |
|                                |          | (1, 1.5) | 50   | 100                       | 6                               | 2.2   | 85.6                      | 94.8                            | -15.1 | 82.1 | 94.3 |
|                                |          |          |      |                           | 10                              | 3.8   | 94.4                      | 95.1                            | -7.8  | 88.6 | 94.0 |
|                                |          |          |      |                           | 20                              | 2.5   | 96.6                      | 94.8                            | -5.3  | 95.8 | 94.6 |
|                                |          |          |      | 200                       | 6                               | -7.3  | 86.5                      | 94.8                            | -11.5 | 72.8 | 94.4 |
|                                |          |          |      |                           | 10                              | -4.2  | 96.6                      | 95.4                            | -4.8  | 89.9 | 94.5 |
|                                |          |          |      |                           | 20                              | -1.0  | 98.4                      | 95.9                            | -3.3  | 94.2 | 94.6 |
|                                | 500      |          | 6    | -3.6                      | 85.9                            | 95.3  | -7.4                      | 71.7                            | 94.0  |      |      |
|                                |          |          | 10   | -1.2                      | 90.9                            | 94.3  | -4.4                      | 86.0                            | 94.4  |      |      |
|                                |          |          | 20   | -2.5                      | 95.7                            | 94.5  | -1.3                      | 93.1                            | 94.0  |      |      |
|                                |          |          | 1000 | 6                         | -2.8                            | 76.0  | 95.5                      | -6.4                            | 77.3  | 94.5 |      |
|                                |          |          |      | 10                        | -1.8                            | 92.2  | 95.5                      | -2.5                            | 82.1  | 94.0 |      |
|                                |          |          |      | 20                        | -3.3                            | 92.2  | 94.0                      | -1.0                            | 92.5  | 94.2 |      |
| 100                            | 100      | 6        | 9.1  | 88.5                      | 94.7                            | -15.0 | 79.2                      | 92.9                            |       |      |      |
|                                |          | 10       | 3.0  | 96.2                      | 95.0                            | -5.7  | 89.3                      | 94.0                            |       |      |      |
|                                |          | 20       | 2.8  | 96.9                      | 94.8                            | -4.1  | 97.2                      | 95.1                            |       |      |      |
|                                |          | 200      | 6    | 4.2                       | 92.0                            | 95.1  | -12.7                     | 86.9                            | 94.2  |      |      |
|                                |          |          | 10   | -0.1                      | 96.6                            | 95.0  | -4.6                      | 87.4                            | 94.5  |      |      |
|                                |          |          | 20   | 0.6                       | 97.1                            | 95.7  | -2.1                      | 93.9                            | 95.2  |      |      |
|                                | 500      | 6        | -4.4 | 80.8                      | 94.7                            | -6.2  | 74.9                      | 94.0                            |       |      |      |
|                                |          | 10       | -2.5 | 93.7                      | 94.7                            | -3.2  | 86.1                      | 94.8                            |       |      |      |
|                                |          | 20       | -0.8 | 96.9                      | 94.4                            | -2.1  | 96.0                      | 95.4                            |       |      |      |
|                                |          | 1000     | 6    | -3.8                      | 91.4                            | 95.6  | -3.8                      | 74.8                            | 94.6  |      |      |
|                                |          |          | 10   | -1.7                      | 95.2                            | 94.5  | -2.2                      | 84.4                            | 94.6  |      |      |
|                                |          |          | 20   | -1.0                      | 97.1                            | 94.9  | -1.4                      | 94.3                            | 95.0  |      |      |
|                                | 200      | 100      | 6    | 1.7                       | 91.9                            | 95.7  | -8.7                      | 81.6                            | 94.7  |      |      |
|                                |          |          | 10   | 2.7                       | 98.3                            | 95.1  | -4.8                      | 93.2                            | 95.1  |      |      |
|                                |          |          | 20   | 1.2                       | 97.8                            | 95.7  | -1.5                      | 99.0                            | 95.7  |      |      |
|                                |          |          | 200  | 6                         | 0.5                             | 91.1  | 95.6                      | -6.8                            | 83.7  | 94.8 |      |
|                                |          |          |      | 10                        | 1.8                             | 92.9  | 94.8                      | -4.0                            | 91.0  | 95.0 |      |
|                                |          |          |      | 20                        | 2.8                             | 95.5  | 94.3                      | -2.7                            | 93.3  | 93.7 |      |
| 500                            |          | 6        | 1.0  | 89.7                      | 94.5                            | -5.5  | 77.4                      | 94.3                            |       |      |      |
|                                |          | 10       | -0.7 | 96.0                      | 95.2                            | -2.3  | 90.5                      | 94.4                            |       |      |      |
|                                |          | 20       | -0.6 | 95.5                      | 94.7                            | -1.1  | 93.7                      | 94.4                            |       |      |      |
|                                |          | 1000     | 6    | 0.1                       | 90.4                            | 95.0  | -5.3                      | 73.9                            | 94.7  |      |      |
|                                |          |          | 10   | -0.6                      | 94.5                            | 94.6  | -2.3                      | 90.7                            | 94.2  |      |      |
|                                |          |          | 20   | -1.6                      | 95.6                            | 94.5  | -1.3                      | 95.0                            | 94.2  |      |      |

| exp( $\beta^*$ ) | $n_{1j}$ | $n_{2j}$   | $J$  | Bias              | $\hat{\beta}_{11}$ | CP95  | Bias              | $\hat{\beta}_{12}$ | CP95  |       |      |      |
|------------------|----------|------------|------|-------------------|--------------------|-------|-------------------|--------------------|-------|-------|------|------|
|                  |          |            |      | ( $\times 1000$ ) | SE/EMP.SD          |       | ( $\times 1000$ ) | SE/EMP.SD          |       |       |      |      |
| (1, 2)           | 50       | 100        | 6    | -20.3             | 87.5               | 95.3  | 3.0               | 88.6               | 94.1  |       |      |      |
|                  |          |            | 10   | -6.5              | 100.6              | 95.6  | -0.7              | 96.2               | 95.0  |       |      |      |
|                  |          |            | 20   | -1.8              | 97.9               | 94.5  | -2.6              | 93.7               | 94.1  |       |      |      |
|                  |          |            | 200  | 6                 | -10.1              | 89.3  | 95.0              | -0.6               | 82.9  | 95.2  |      |      |
|                  |          |            |      | 10                | -10.5              | 99.3  | 95.3              | -3.2               | 93.4  | 95.0  |      |      |
|                  |          |            |      | 20                | -5.1               | 99.0  | 95.0              | -1.8               | 94.5  | 95.6  |      |      |
|                  |          | 500        | 6    | -13.9             | 88.9               | 94.6  | -3.0              | 82.5               | 94.8  |       |      |      |
|                  |          |            | 10   | -9.6              | 94.6               | 95.2  | -1.1              | 91.8               | 93.8  |       |      |      |
|                  |          |            | 20   | -4.8              | 96.2               | 94.8  | -1.1              | 91.4               | 94.8  |       |      |      |
|                  |          |            | 1000 | 6                 | -9.8               | 83.4  | 94.9              | -3.2               | 79.9  | 94.1  |      |      |
|                  |          |            |      | 10                | -8.4               | 94.7  | 95.5              | -0.6               | 88.8  | 94.8  |      |      |
|                  |          |            |      | 20                | -2.7               | 96.4  | 94.8              | -1.1               | 91.2  | 94.8  |      |      |
|                  |          | 100        | 100  | 6                 | -8.2               | 91.1  | 94.8              | -2.6               | 83.4  | 95.2  |      |      |
|                  |          |            |      | 10                | -6.2               | 94.3  | 95.0              | -1.1               | 93.2  | 94.8  |      |      |
|                  |          |            |      | 20                | -2.1               | 96.3  | 94.0              | -2.1               | 92.8  | 94.2  |      |      |
|                  |          |            |      | 200               | 6                  | -6.0  | 88.6              | 95.4               | -0.4  | 90.0  | 95.2 |      |
|                  |          |            |      |                   | 10                 | -4.2  | 97.6              | 95.3               | -2.3  | 95.0  | 94.9 |      |
|                  |          |            |      |                   | 20                 | -1.7  | 100.4             | 95.6               | -0.8  | 94.8  | 95.8 |      |
|                  |          |            | 500  | 6                 | -2.1               | 89.8  | 95.0              | -4.0               | 90.5  | 94.8  |      |      |
|                  |          |            |      | 10                | -3.2               | 99.0  | 95.5              | -2.7               | 93.0  | 95.2  |      |      |
|                  |          |            |      | 20                | -1.1               | 100.7 | 95.2              | -1.1               | 93.5  | 95.2  |      |      |
|                  |          |            |      | 1000              | 6                  | -7.4  | 93.1              | 95.9               | 0.2   | 80.8  | 95.9 |      |
|                  |          |            |      |                   | 10                 | -3.3  | 94.6              | 94.5               | -2.3  | 87.5  | 94.5 |      |
|                  |          |            |      |                   | 20                 | -2.0  | 102.2             | 96.0               | -1.5  | 92.9  | 94.2 |      |
|                  | 200      |            | 100  | 6                 | -2.7               | 90.3  | 95.4              | 0.3                | 92.9  | 95.5  |      |      |
|                  |          |            |      | 10                | -0.6               | 94.6  | 95.0              | -1.8               | 94.5  | 95.1  |      |      |
|                  |          |            |      | 20                | -0.1               | 95.3  | 95.2              | -0.6               | 92.5  | 94.4  |      |      |
|                  |          |            |      | 200               | 6                  | -9.3  | 85.3              | 94.9               | 0.0   | 89.0  | 95.0 |      |
|                  |          |            |      |                   | 10                 | -2.9  | 94.0              | 94.2               | -1.7  | 93.7  | 95.5 |      |
|                  |          |            |      |                   | 20                 | 0.1   | 96.0              | 95.0               | -2.0  | 91.9  | 93.8 |      |
|                  |          |            | 500  | 6                 | -2.0               | 90.7  | 94.8              | -3.5               | 87.3  | 95.3  |      |      |
|                  |          |            |      | 10                | -2.8               | 94.5  | 94.7              | -1.9               | 90.8  | 95.0  |      |      |
|                  |          |            |      | 20                | 0.5                | 98.8  | 94.9              | -0.6               | 91.1  | 94.3  |      |      |
|                  |          |            |      | 1000              | 6                  | -2.3  | 87.2              | 95.3               | -3.8  | 81.5  | 94.7 |      |
|                  |          |            |      |                   | 10                 | -0.4  | 96.7              | 95.0               | -1.6  | 89.1  | 94.3 |      |
|                  |          |            |      |                   | 20                 | 0.7   | 99.2              | 95.2               | -1.3  | 91.6  | 94.2 |      |
|                  |          | (1.2, 1.5) | 50   | 100               | 6                  | -4.2  | 96.5              | 95.1               | -7.7  | 84.1  | 94.0 |      |
|                  |          |            |      |                   | 10                 | -5.0  | 98.8              | 94.9               | -5.0  | 92.2  | 95.2 |      |
|                  |          |            |      |                   | 20                 | -2.5  | 101.3             | 95.2               | -1.3  | 102.7 | 95.6 |      |
|                  |          |            |      |                   | 200                | 6     | -3.2              | 95.0               | 94.9  | -10.4 | 81.0 | 95.4 |
|                  |          |            |      |                   |                    | 10    | -8.0              | 92.7               | 94.2  | -3.9  | 91.9 | 95.2 |
|                  |          |            |      |                   |                    | 20    | -3.8              | 102.2              | 95.5  | -0.9  | 99.7 | 95.2 |
|                  | 500      |            |      | 6                 | -9.9               | 87.2  | 95.2              | -4.1               | 82.0  | 95.5  |      |      |
|                  |          |            |      | 10                | -3.7               | 95.3  | 95.3              | -2.2               | 86.7  | 95.2  |      |      |
|                  |          |            |      | 20                | -2.5               | 96.6  | 94.7              | -0.8               | 98.3  | 95.5  |      |      |
|                  |          |            |      | 1000              | 6                  | -10.6 | 84.3              | 94.3               | -3.6  | 75.9  | 95.3 |      |
|                  |          |            |      |                   | 10                 | -6.4  | 88.2              | 94.0               | -1.8  | 85.2  | 94.0 |      |
|                  |          |            |      |                   | 20                 | -2.0  | 96.9              | 94.9               | -0.1  | 95.8  | 94.8 |      |
| 100              | 100      |            |      | 6                 | -3.1               | 92.9  | 94.7              | -6.0               | 86.2  | 95.5  |      |      |
|                  |          |            |      | 10                | 5.1                | 101.9 | 95.7              | -5.5               | 100.9 | 95.4  |      |      |
|                  |          |            |      | 20                | 3.9                | 101.1 | 95.5              | -2.2               | 101.6 | 95.0  |      |      |
|                  |          |            |      | 200               | 6                  | -5.9  | 91.4              | 94.6               | -3.2  | 83.6  | 95.5 |      |
|                  |          |            |      |                   | 10                 | -2.9  | 99.5              | 95.4               | -2.4  | 94.9  | 95.3 |      |
|                  |          |            |      |                   | 20                 | -0.8  | 98.4              | 95.0               | -1.1  | 97.5  | 94.5 |      |
|                  | 500      |            |      | 6                 | -6.5               | 91.1  | 94.6              | -2.9               | 88.3  | 94.8  |      |      |
|                  |          |            |      | 10                | -0.3               | 99.7  | 95.2              | -2.8               | 94.7  | 94.8  |      |      |
|                  |          |            |      | 20                | -2.4               | 102.5 | 95.8              | -0.4               | 102.5 | 95.8  |      |      |
|                  |          |            |      | 1000              | 6                  | -4.2  | 89.7              | 95.0               | -3.0  | 80.5  | 95.8 |      |
|                  |          |            |      |                   | 10                 | -2.7  | 94.6              | 94.2               | -2.0  | 90.2  | 95.2 |      |
|                  |          |            |      |                   | 20                 | -1.6  | 99.9              | 95.4               | 0.1   | 98.1  | 95.3 |      |
|                  | 200      |            | 100  | 6                 | -3.2               | 91.6  | 95.0              | -2.5               | 91.8  | 95.0  |      |      |
|                  |          |            |      | 10                | 1.1                | 102.4 | 96.0              | -2.0               | 100.9 | 95.5  |      |      |
|                  |          |            |      | 20                | 1.0                | 100.7 | 95.3              | 0.0                | 98.7  | 95.2  |      |      |
|                  |          |            |      | 200               | 6                  | 2.4   | 95.7              | 95.3               | -5.5  | 93.0  | 95.0 |      |
|                  |          |            |      |                   | 10                 | -0.2  | 98.0              | 94.9               | -1.6  | 98.0  | 96.0 |      |
|                  |          |            |      |                   | 20                 | 1.6   | 98.5              | 95.1               | -0.2  | 101.7 | 95.5 |      |
|                  |          |            | 500  | 6                 | -0.5               | 93.3  | 94.8              | -4.6               | 93.5  | 94.8  |      |      |
|                  |          |            |      | 10                | -1.1               | 95.0  | 94.3              | -1.1               | 97.1  | 94.9  |      |      |
|                  |          |            |      | 20                | -1.2               | 97.6  | 94.4              | 0.2                | 98.1  | 94.8  |      |      |
|                  |          |            |      | 1000              | 6                  | -2.3  | 91.3              | 95.1               | -2.3  | 78.6  | 94.8 |      |
|                  |          |            |      |                   | 10                 | -1.8  | 97.6              | 95.2               | -0.7  | 94.7  | 95.5 |      |
|                  |          |            |      |                   | 20                 | -1.2  | 98.6              | 94.5               | 0.3   | 97.2  | 94.2 |      |

| exp( $\beta^*$ )                     | $n_{1j}$ | $n_{2j}$ | $J$  | $\hat{\beta}_{11}$        |           |       | $\hat{\beta}_{12}$        |           |       |       |      |
|--------------------------------------|----------|----------|------|---------------------------|-----------|-------|---------------------------|-----------|-------|-------|------|
|                                      |          |          |      | Bias<br>( $\times 1000$ ) | SE/EMP.SD | CP95  | Bias<br>( $\times 1000$ ) | SE/EMP.SD | CP95  |       |      |
| (1.2, 2)                             | 50       | 100      | 6    | -29.2                     | 91.6      | 95.4  | 5.1                       | 86.0      | 96.0  |       |      |
|                                      |          |          | 10   | -13.6                     | 101.4     | 95.8  | 1.6                       | 102.2     | 96.0  |       |      |
|                                      |          |          | 20   | -6.5                      | 99.6      | 95.2  | -0.9                      | 101.4     | 94.8  |       |      |
|                                      |          |          | 200  | 6                         | -21.6     | 89.9  | 95.1                      | 4.7       | 89.7  | 95.1  |      |
|                                      |          |          |      | 10                        | -16.7     | 94.9  | 95.5                      | 0.9       | 97.6  | 96.0  |      |
|                                      |          |          |      | 20                        | -4.8      | 100.0 | 95.0                      | -1.4      | 101.4 | 96.2  |      |
|                                      |          | 500      | 6    | -19.0                     | 80.1      | 95.1  | -1.2                      | 77.7      | 95.5  |       |      |
|                                      |          |          | 10   | -12.4                     | 97.1      | 95.5  | 1.4                       | 99.5      | 96.5  |       |      |
|                                      |          |          | 20   | -6.7                      | 94.4      | 94.6  | -0.8                      | 101.8     | 96.0  |       |      |
|                                      |          |          | 1000 | 6                         | -13.2     | 83.3  | 95.2                      | -1.0      | 82.0  | 94.4  |      |
|                                      |          |          |      | 10                        | -9.2      | 92.3  | 94.9                      | 0.5       | 94.2  | 95.5  |      |
|                                      |          |          |      | 20                        | -4.9      | 96.4  | 95.2                      | 0.1       | 96.4  | 94.8  |      |
|                                      |          | 100      | 200  | 6                         | -13.8     | 94.5  | 95.8                      | -0.8      | 94.1  | 95.2  |      |
|                                      |          |          |      | 10                        | -3.8      | 98.2  | 94.8                      | -0.1      | 102.7 | 95.2  |      |
|                                      |          |          |      | 20                        | -6.8      | 100.3 | 95.2                      | 1.5       | 102.7 | 95.5  |      |
|                                      |          |          |      | 500                       | 6         | -13.0 | 84.6                      | 95.2      | 2.1   | 95.8  | 95.9 |
|                                      |          |          |      |                           | 10        | -8.4  | 96.4                      | 94.7      | 0.2   | 99.6  | 95.5 |
|                                      |          |          |      |                           | 20        | -6.4  | 98.0                      | 94.6      | 0.7   | 104.8 | 95.9 |
|                                      | 1000     |          | 6    | -13.7                     | 89.2      | 95.4  | 0.2                       | 97.8      | 95.2  |       |      |
|                                      |          |          | 10   | -3.6                      | 96.5      | 95.5  | -2.1                      | 98.3      | 95.6  |       |      |
|                                      |          |          | 20   | -5.4                      | 97.5      | 95.5  | 0.1                       | 100.5     | 95.3  |       |      |
|                                      |          |          | 200  | 6                         | -7.2      | 87.8  | 94.9                      | -0.3      | 83.4  | 94.6  |      |
|                                      |          |          |      | 10                        | -4.1      | 95.4  | 94.5                      | -1.1      | 96.6  | 95.3  |      |
|                                      |          |          |      | 20                        | -4.3      | 96.0  | 94.8                      | 0.4       | 101.1 | 95.0  |      |
|                                      | 200      |          | 100  | 6                         | -11.8     | 87.6  | 96.2                      | 3.5       | 93.8  | 95.0  |      |
|                                      |          |          |      | 10                        | -3.1      | 96.8  | 95.5                      | 0.3       | 106.4 | 96.5  |      |
|                                      |          |          |      | 20                        | -1.1      | 100.4 | 95.2                      | -0.1      | 103.6 | 95.8  |      |
|                                      |          |          |      | 200                       | 6         | -6.9  | 93.2                      | 95.8      | -0.1  | 96.2  | 95.8 |
|                                      |          |          |      |                           | 10        | -1.6  | 98.7                      | 95.4      | -1.5  | 102.1 | 95.2 |
|                                      |          |          |      |                           | 20        | -0.5  | 98.7                      | 95.2      | -0.5  | 105.5 | 95.7 |
|                                      |          | 500      | 6    | -9.3                      | 87.9      | 95.5  | 1.1                       | 85.5      | 96.5  |       |      |
|                                      |          |          | 10   | -3.8                      | 96.4      | 95.2  | -1.0                      | 101.6     | 95.5  |       |      |
|                                      |          |          | 20   | -2.6                      | 100.4     | 95.1  | 1.0                       | 103.3     | 95.2  |       |      |
|                                      |          |          | 1000 | 6                         | -8.5      | 83.5  | 95.0                      | -0.6      | 94.5  | 95.7  |      |
|                                      |          |          |      | 10                        | -6.2      | 97.3  | 95.7                      | -0.3      | 101.3 | 95.8  |      |
|                                      |          |          |      | 20                        | -1.6      | 98.2  | 95.3                      | -0.1      | 102.0 | 95.7  |      |
| Scenario 2a ( $J_1 = 6, J_2 = 12$ )  |          |          |      |                           |           |       |                           |           |       |       |      |
| (1.0, 1.2)                           | 50       | 200      |      | -6.2                      | 92.1      | 94.8  | -8.7                      | 79.5      | 94.0  |       |      |
| (1.0, 1.5)                           |          |          |      | -6.2                      | 97.2      | 95.3  | -5.0                      | 82.0      | 94.9  |       |      |
| (1.0, 2.0)                           |          |          |      | -7.0                      | 93.3      | 95.5  | -0.7                      | 89.1      | 94.7  |       |      |
| (1.2, 1.5)                           |          |          |      | -6.9                      | 96.4      | 95.5  | -2.0                      | 91.0      | 94.8  |       |      |
| (1.2, 2.0)                           |          |          |      | -13.5                     | 95.6      | 95.9  | 5.0                       | 94.7      | 95.5  |       |      |
| Scenario 2b ( $J_1 = 10, J_2 = 20$ ) |          |          |      |                           |           |       |                           |           |       |       |      |
| (1.0, 1.2)                           | 50       | 200      | 5.0  | -1.7                      | 96.4      | 95.6  | -6.0                      | 85.1      | 94.6  |       |      |
| (1.0, 1.5)                           |          |          |      | -4.7                      | 96.3      | 94.8  | -2.4                      | 90.7      | 94.2  |       |      |
| (1.0, 2.0)                           |          |          |      | -4.5                      | 95.7      | 94.5  | -2.4                      | 94.3      | 94.2  |       |      |
| (1.2, 1.5)                           |          |          |      | -5.6                      | 96.9      | 94.6  | -2.6                      | 95.5      | 95.5  |       |      |
| (1.2, 2.0)                           |          |          |      | -11.2                     | 93.4      | 94.7  | 1.1                       | 100.1     | 95.2  |       |      |

Table A3: Extended version of Table 2 in the main paper. Simulation results for estimated optimal package. Unit costs were  $c_1 = 1$  and  $c_2 = 8$ . Results include bias for optimal individual components (times 100) and empirical mean squared error (times 100) of the second-stage recommended intervention and the final estimated optimal package.

| $e^{\beta^*}$ | $\mathbf{x}^{opt}$ | $n_{1j}$   | $n_{2j}$ | J  | Stage 1                               |                                       |                          | Stage 2                               |                                       |                          |      |       |
|---------------|--------------------|------------|----------|----|---------------------------------------|---------------------------------------|--------------------------|---------------------------------------|---------------------------------------|--------------------------|------|-------|
|               |                    |            |          |    | Bias <sub>1</sub><br>( $\times 100$ ) | Bias <sub>2</sub><br>( $\times 100$ ) | RMSE<br>( $\times 100$ ) | Bias <sub>1</sub><br>( $\times 100$ ) | Bias <sub>2</sub><br>( $\times 100$ ) | RMSE<br>( $\times 100$ ) |      |       |
| (0, 3.2)      | (2, 4.5)           | 50         | 100      | 6  | 75.3                                  | -47.0                                 | 170.8                    | 57.3                                  | -14.2                                 | 116.2                    |      |       |
|               |                    |            |          | 10 | 63.0                                  | -20.2                                 | 131.9                    | 47.1                                  | -8.9                                  | 100.7                    |      |       |
|               |                    |            |          | 20 | 52.8                                  | -10.0                                 | 110.6                    | 34.5                                  | -4.7                                  | 85.0                     |      |       |
|               |                    |            | 200      | 6  | 76.4                                  | -46.3                                 | 169.6                    | 52.2                                  | -12.9                                 | 109.5                    |      |       |
|               |                    |            |          | 10 | 66.9                                  | -18.2                                 | 134.6                    | 40.3                                  | -6.4                                  | 92.3                     |      |       |
|               |                    |            |          | 20 | 53.4                                  | -9.5                                  | 111.1                    | 23.8                                  | -3.1                                  | 70.5                     |      |       |
|               |                    |            | 500      | 6  | 75.9                                  | -47.9                                 | 170.5                    | 42.5                                  | -7.9                                  | 97.4                     |      |       |
|               |                    |            |          | 10 | 67.9                                  | -19.6                                 | 134.7                    | 29.6                                  | -4.9                                  | 78.8                     |      |       |
|               |                    |            |          | 20 | 52.6                                  | -11.5                                 | 110.5                    | 16.5                                  | -2.1                                  | 58.5                     |      |       |
|               |                    |            | 1000     | 6  | 79.2                                  | -44.4                                 | 173.4                    | 34.9                                  | -6.1                                  | 87.6                     |      |       |
|               |                    |            |          | 10 | 68.8                                  | -18.3                                 | 136.1                    | 22.7                                  | -3.6                                  | 68.8                     |      |       |
|               |                    |            |          | 20 | 51.7                                  | -9.9                                  | 109.9                    | 9.1                                   | -0.8                                  | 43.5                     |      |       |
|               |                    | 100        | 100      | 6  | 70.0                                  | -30.7                                 | 150.5                    | 55.6                                  | -10.8                                 | 111.9                    |      |       |
|               |                    |            |          | 10 | 54.8                                  | -14.7                                 | 115.9                    | 39.4                                  | -6.7                                  | 91.8                     |      |       |
|               |                    |            |          | 20 | 35.0                                  | -5.8                                  | 89.0                     | 24.0                                  | -2.5                                  | 71.0                     |      |       |
|               |                    |            | 200      | 6  | 71.3                                  | -29.2                                 | 150.5                    | 49.5                                  | -10.0                                 | 104.2                    |      |       |
|               |                    |            |          | 10 | 58.5                                  | -11.5                                 | 119.5                    | 35.3                                  | -5.2                                  | 86.2                     |      |       |
|               |                    |            |          | 20 | 34.0                                  | -6.4                                  | 87.5                     | 16.7                                  | -2.0                                  | 59.2                     |      |       |
|               |                    |            | 500      | 6  | 70.8                                  | -32.4                                 | 151.5                    | 38.0                                  | -6.6                                  | 90.9                     |      |       |
|               |                    |            |          | 10 | 63.0                                  | -12.4                                 | 123.8                    | 26.1                                  | -3.2                                  | 73.8                     |      |       |
|               |                    |            |          | 20 | 38.9                                  | -7.5                                  | 93.0                     | 10.6                                  | -0.9                                  | 47.0                     |      |       |
|               |                    |            | 1000     | 6  | 70.1                                  | -30.5                                 | 149.7                    | 30.8                                  | -6.1                                  | 81.1                     |      |       |
|               |                    |            |          | 10 | 57.9                                  | -12.7                                 | 119.1                    | 19.5                                  | -2.3                                  | 63.7                     |      |       |
|               |                    |            |          | 20 | 36.1                                  | -5.6                                  | 90.0                     | 5.2                                   | 0.1                                   | 33.1                     |      |       |
|               |                    | 200        | 100      | 6  | 59.4                                  | -22.2                                 | 130.6                    | 43.3                                  | -8.5                                  | 97.9                     |      |       |
|               |                    |            |          | 10 | 41.8                                  | -7.9                                  | 98.2                     | 30.0                                  | -4.0                                  | 80.0                     |      |       |
|               |                    |            |          | 20 | 21.8                                  | -2.1                                  | 69.6                     | 15.1                                  | -1.5                                  | 56.7                     |      |       |
|               |                    |            | 200      | 6  | 61.8                                  | -21.9                                 | 134.2                    | 35.8                                  | -6.7                                  | 88.8                     |      |       |
|               |                    |            |          | 10 | 44.2                                  | -8.5                                  | 102.1                    | 28.2                                  | -3.7                                  | 76.9                     |      |       |
|               |                    |            |          | 20 | 22.6                                  | -2.5                                  | 70.7                     | 11.2                                  | -0.4                                  | 48.8                     |      |       |
|               |                    |            | 500      | 6  | 63.1                                  | -20.3                                 | 133.1                    | 33.8                                  | -4.6                                  | 84.5                     |      |       |
|               |                    |            |          | 10 | 40.6                                  | -10.5                                 | 97.5                     | 18.6                                  | -2.0                                  | 62.4                     |      |       |
|               |                    |            |          | 20 | 21.6                                  | -3.7                                  | 69.3                     | 7.0                                   | -0.5                                  | 38.4                     |      |       |
|               |                    |            | 1000     | 6  | 62.6                                  | -22.7                                 | 134.0                    | 28.6                                  | -3.8                                  | 77.6                     |      |       |
|               |                    |            |          | 10 | 45.9                                  | -8.6                                  | 102.1                    | 14.6                                  | -1.4                                  | 55.1                     |      |       |
|               |                    |            |          | 20 | 22.2                                  | -3.2                                  | 69.8                     | 3.8                                   | 0.2                                   | 28.4                     |      |       |
|               |                    | (1.2, 1.5) | (2, 4.5) | 50 | 100                                   | 6                                     | -68.5                    | -88.2                                 | 208.6                                 | -37.0                    | -7.0 | 105.7 |
|               |                    |            |          |    |                                       | 10                                    | -48.4                    | -36.4                                 | 142.8                                 | -26.6                    | 2.1  | 81.6  |
|               |                    |            |          |    |                                       | 20                                    | -30.0                    | -9.9                                  | 94.5                                  | -9.5                     | 2.7  | 51.6  |
|               |                    |            |          |    | 200                                   | 6                                     | -69.4                    | -94.7                                 | 213.3                                 | -32.0                    | -1.2 | 95.9  |
|               |                    |            |          |    |                                       | 10                                    | -47.1                    | -33.6                                 | 139.8                                 | -22.1                    | 4.3  | 73.7  |
|               |                    |            |          |    |                                       | 20                                    | -27.9                    | -8.3                                  | 90.4                                  | -5.7                     | 3.3  | 39.8  |
|               |                    |            |          |    | 500                                   | 6                                     | -69.8                    | -90.8                                 | 210.0                                 | -24.3                    | 0.0  | 82.7  |
|               |                    |            |          |    |                                       | 10                                    | -49.8                    | -36.3                                 | 143.8                                 | -9.8                     | 2.7  | 51.2  |
|               |                    |            |          |    |                                       | 20                                    | -30.7                    | -9.8                                  | 94.8                                  | -2.7                     | 2.1  | 27.8  |
|               |                    |            |          |    | 1000                                  | 6                                     | -65.5                    | -95.0                                 | 212.7                                 | -17.1                    | 2.2  | 68.4  |
|               |                    |            |          |    |                                       | 10                                    | -52.8                    | -35.4                                 | 144.2                                 | -6.2                     | 3.8  | 41.5  |
|               |                    |            |          |    |                                       | 20                                    | -27.5                    | -9.6                                  | 91.5                                  | -0.5                     | 1.1  | 15.8  |
| 100           | 100                |            |          | 6  | -54.4                                 | -57.1                                 | 174.1                    | -31.8                                 | -4.9                                  | 97.1                     |      |       |
|               |                    |            |          | 10 | -32.2                                 | -15.2                                 | 104.1                    | -14.5                                 | 2.2                                   | 63.4                     |      |       |
|               |                    |            |          | 20 | -14.9                                 | -3.1                                  | 68.6                     | -3.6                                  | 1.2                                   | 35.9                     |      |       |
|               | 200                |            |          | 6  | -55.9                                 | -57.5                                 | 171.9                    | -25.8                                 | -0.8                                  | 84.6                     |      |       |
|               |                    |            |          | 10 | -35.2                                 | -14.8                                 | 107.4                    | -11.9                                 | 3.2                                   | 56.3                     |      |       |
|               |                    |            |          | 20 | -15.8                                 | -2.4                                  | 69.5                     | -3.1                                  | 2.2                                   | 31.0                     |      |       |
|               | 500                |            |          | 6  | -52.5                                 | -57.8                                 | 171.7                    | -18.7                                 | 2.6                                   | 69.1                     |      |       |
|               |                    |            |          | 10 | -33.4                                 | -17.8                                 | 109.2                    | -5.5                                  | 3.0                                   | 39.8                     |      |       |
|               |                    |            |          | 20 | -16.6                                 | -2.5                                  | 70.9                     | -0.7                                  | 1.7                                   | 18.1                     |      |       |
|               | 1000               |            |          | 6  | -60.3                                 | -55.5                                 | 173.4                    | -13.3                                 | 1.9                                   | 59.7                     |      |       |
|               |                    |            |          | 10 | -37.5                                 | -18.8                                 | 115.0                    | -3.4                                  | 3.0                                   | 31.9                     |      |       |
|               |                    |            |          | 20 | -14.6                                 | -3.4                                  | 68.1                     | -0.3                                  | 0.7                                   | 13.2                     |      |       |
| 200           | 100                |            |          | 6  | -44.6                                 | -35.8                                 | 142.4                    | -23.2                                 | -1.3                                  | 79.3                     |      |       |
|               |                    |            |          | 10 | -21.7                                 | -4.9                                  | 81.3                     | -8.4                                  | 1.9                                   | 50.5                     |      |       |
|               |                    |            |          | 20 | -5.1                                  | 0.1                                   | 45.5                     | -1.3                                  | 0.3                                   | 27.3                     |      |       |
|               | 200                |            |          | 6  | -46.3                                 | -32.8                                 | 142.6                    | -16.2                                 | 2.2                                   | 67.5                     |      |       |
|               |                    |            |          | 10 | -21.9                                 | -7.8                                  | 85.3                     | -7.6                                  | 2.1                                   | 46.4                     |      |       |
|               |                    |            |          | 20 | -5.3                                  | -0.4                                  | 46.3                     | -0.6                                  | -0.1                                  | 19.9                     |      |       |
|               | 500                |            |          | 6  | -40.5                                 | -34.3                                 | 139.4                    | -12.8                                 | 3.4                                   | 57.8                     |      |       |
|               |                    |            |          | 10 | -24.1                                 | -6.8                                  | 86.4                     | -4.2                                  | 1.9                                   | 34.9                     |      |       |
|               |                    |            |          | 20 | -6.4                                  | -0.4                                  | 48.5                     | -0.2                                  | 0.6                                   | 13.9                     |      |       |
|               | 1000               |            |          | 6  | -41.5                                 | -31.0                                 | 136.5                    | -8.3                                  | 2.1                                   | 48.0                     |      |       |
|               |                    |            |          | 10 | -19.8                                 | -5.8                                  | 78.6                     | -1.7                                  | 1.7                                   | 24.0                     |      |       |
|               |                    |            |          | 20 | -4.9                                  | 0.0                                   | 44.0                     | -0.1                                  | 0.4                                   | 10.3                     |      |       |

Table A.3: continued

| $e^{\beta^*}$ | $\mathbf{x}^{opt}$ | $n_{1j}$ | $n_{2j}$ | J    | Stage 1                               |                                       |                          | Stage 2                               |                                       |                          |       |       |
|---------------|--------------------|----------|----------|------|---------------------------------------|---------------------------------------|--------------------------|---------------------------------------|---------------------------------------|--------------------------|-------|-------|
|               |                    |          |          |      | Bias <sub>1</sub><br>( $\times 100$ ) | Bias <sub>2</sub><br>( $\times 100$ ) | RMSE<br>( $\times 100$ ) | Bias <sub>1</sub><br>( $\times 100$ ) | Bias <sub>2</sub><br>( $\times 100$ ) | RMSE<br>( $\times 100$ ) |       |       |
| (1.2, 2)      | (2, 2.6)           | 50       | 100      | 6    | -83.2                                 | -27.6                                 | 166.0                    | -68.2                                 | 3.2                                   | 125.3                    |       |       |
|               |                    |          |          | 10   | -67.7                                 | -6.9                                  | 132.4                    | -53.9                                 | 4.7                                   | 107.6                    |       |       |
|               |                    |          |          | 20   | -50.2                                 | -0.5                                  | 106.3                    | -33.1                                 | 4.5                                   | 84.0                     |       |       |
|               |                    |          |          | 200  | 6                                     | -80.4                                 | -30.9                    | 164.3                                 | -59.0                                 | 3.1                      | 114.9 |       |
|               |                    |          |          |      | 10                                    | -67.6                                 | -7.0                     | 133.0                                 | -43.3                                 | 5.1                      | 96.4  |       |
|               |                    |          |          |      | 20                                    | -45.6                                 | -0.3                     | 101.6                                 | -23.2                                 | 3.7                      | 70.3  |       |
|               |                    |          | 500      | 6    | -79.7                                 | -27.2                                 | 163.2                    | -48.5                                 | 4.5                                   | 103.8                    |       |       |
|               |                    |          |          | 10   | -69.2                                 | -6.9                                  | 132.9                    | -30.9                                 | 4.2                                   | 81.2                     |       |       |
|               |                    |          |          | 20   | -51.4                                 | 0.5                                   | 107.1                    | -14.9                                 | 3.3                                   | 56.6                     |       |       |
|               |                    |          |          | 1000 | 6                                     | -82.0                                 | -35.2                    | 167.3                                 | -38.5                                 | 4.1                      | 92.4  |       |
|               |                    |          |          |      | 10                                    | -64.7                                 | -7.5                     | 131.1                                 | -22.9                                 | 3.5                      | 69.9  |       |
|               |                    |          |          |      | 20                                    | -50.4                                 | 0.3                      | 106.6                                 | -7.1                                  | 2.0                      | 39.3  |       |
|               |                    |          | 100      | 100  | 6                                     | -71.6                                 | -16.8                    | 146.3                                 | -54.9                                 | 3.8                      | 110.8 |       |
|               |                    |          |          |      | 10                                    | -52.1                                 | -2.5                     | 111.7                                 | -38.6                                 | 2.6                      | 90.9  |       |
|               |                    |          |          |      | 20                                    | -35.8                                 | 1.7                      | 88.2                                  | -23.2                                 | 3.3                      | 70.3  |       |
|               |                    |          |          |      | 200                                   | 6                                     | -71.1                    | -18.1                                 | 144.5                                 | -51.6                    | 2.7   | 106.6 |
|               |                    |          |          |      |                                       | 10                                    | -55.5                    | 0.1                                   | 114.3                                 | -34.6                    | 3.9   | 86.0  |
|               |                    |          |          |      |                                       | 20                                    | -37.4                    | 1.9                                   | 90.2                                  | -17.4                    | 3.0   | 61.0  |
|               |                    |          |          | 500  | 6                                     | -72.6                                 | -12.5                    | 145.2                                 | -40.3                                 | 4.1                      | 93.1  |       |
|               |                    |          |          |      | 10                                    | -53.4                                 | -1.7                     | 112.7                                 | -24.6                                 | 3.4                      | 72.3  |       |
|               |                    |          |          |      | 20                                    | -35.0                                 | 1.7                      | 87.5                                  | -8.8                                  | 2.3                      | 43.6  |       |
|               |                    |          |          |      | 1000                                  | 6                                     | -75.3                    | -18.6                                 | 145.3                                 | -34.3                    | 3.0   | 86.1  |
|               |                    |          |          |      |                                       | 10                                    | -57.1                    | -2.5                                  | 116.2                                 | -16.9                    | 2.8   | 60.2  |
|               |                    |          |          |      |                                       | 20                                    | -35.2                    | 1.9                                   | 87.4                                  | -5.5                     | 1.6   | 34.5  |
|               |                    | 200      |          | 100  | 6                                     | -62.8                                 | -9.6                     | 130.1                                 | -46.6                                 | 2.1                      | 100.8 |       |
|               |                    |          |          |      | 10                                    | -43.4                                 | 1.0                      | 98.5                                  | -31.3                                 | 2.8                      | 81.8  |       |
|               |                    |          |          |      | 20                                    | -19.2                                 | 1.4                      | 64.6                                  | -10.6                                 | 1.5                      | 48.1  |       |
|               |                    |          |          |      | 200                                   | 6                                     | -60.4                    | -11.4                                 | 127.8                                 | -40.2                    | 3.1   | 93.3  |
|               |                    |          |          |      |                                       | 10                                    | -42.1                    | -0.0                                  | 96.8                                  | -24.1                    | 2.8   | 71.8  |
|               |                    |          |          |      |                                       | 20                                    | -18.2                    | 0.7                                   | 62.9                                  | -7.8                     | 1.2   | 41.4  |
|               |                    |          |          | 500  | 6                                     | -61.0                                 | -9.4                     | 126.9                                 | -32.9                                 | 3.3                      | 84.1  |       |
|               |                    |          |          |      | 10                                    | -40.5                                 | 0.1                      | 95.3                                  | -19.1                                 | 3.0                      | 63.8  |       |
|               |                    |          |          |      | 20                                    | -17.8                                 | 1.3                      | 62.4                                  | -4.4                                  | 0.8                      | 31.0  |       |
|               |                    |          |          |      | 1000                                  | 6                                     | -63.2                    | -10.8                                 | 129.3                                 | -26.2                    | 3.6   | 75.3  |
|               |                    |          |          |      |                                       | 10                                    | -40.5                    | 1.1                                   | 95.1                                  | -12.0                    | 2.8   | 50.7  |
|               |                    |          |          |      |                                       | 20                                    | -18.8                    | 1.0                                   | 63.8                                  | -1.7                     | 0.7   | 19.7  |

Table A4: Extended version of Table 3 in the main paper. Simulation results for estimated optimal package and coverage of confidence bands for success probabilities. Scenario 1 with unit costs  $c_1 = 1$  and  $c_2 = 8$ . Results include empirical 2.5% and 97.5% quantiles of true success rate of second-stage recommended intervention and final estimated optimal intervention, coverage rate of 95% confidence set for optimal intervention package (SetCP95), and its relative size (SetPerc%). Results also include the coverage rate of 95% confidence bands for outcome probability under all values on a grid of  $\mathcal{X}$  (BandsCP95) and the ratio between the mean cost of the estimated optimal intervention and the cost of the optimal true intervention (RelCost).

| $e^{\beta^*}$                   | $\mathbf{x}^{opt}$ | $n_{1j}$ | $n_{2j}$ | $J$         | PrOpt1<br>(Q2.5,Q97.5) | PrOpt2<br>(Q2.5,Q97.5) | SetCP95     | SetPerc%    | BandsCP95 | RelCost |       |       |
|---------------------------------|--------------------|----------|----------|-------------|------------------------|------------------------|-------------|-------------|-----------|---------|-------|-------|
| Scenario 1 ( $J_1 = J_2 = 20$ ) |                    |          |          |             |                        |                        |             |             |           |         |       |       |
| (1,2)                           | (0,3.2)            | 50       | 100      | 6           | (50.0,97.0)            | (82.5,93.5)            | 92.9        | 16.4        | 98.0      | 97.8    |       |       |
|                                 |                    |          |          | 10          | (77.1,96.0)            | (85.8,92.3)            | 94.8        | 11.5        | 97.3      | 99.1    |       |       |
|                                 |                    |          |          | 20          | (83.6,93.8)            | (87.2,91.8)            | 94.0        | 7.6         | 97.0      | 99.9    |       |       |
|                                 |                    |          |          | 200         | 6                      | (50.0,97.0)            | (83.5,92.8) | 93.2        | 13.8      | 96.6    | 98.0  |       |
|                                 |                    |          |          |             | 10                     | (77.5,95.7)            | (86.6,91.8) | 95.2        | 8.8       | 97.8    | 99.6  |       |
|                                 |                    |          |          |             | 20                     | (83.7,93.8)            | (88.0,91.4) | 95.8        | 5.8       | 97.5    | 100.0 |       |
|                                 |                    | 500      | 6        | (50.0,97.0) | (85.0,92.3)            | 94.1                   | 10.2        | 97.4        | 99.2      |         |       |       |
|                                 |                    |          | 10       | (78.1,95.9) | (87.1,91.4)            | 94.5                   | 6.4         | 96.8        | 99.6      |         |       |       |
|                                 |                    |          | 20       | (83.5,93.7) | (88.2,91.1)            | 95.0                   | 4.0         | 97.2        | 100.0     |         |       |       |
|                                 |                    |          | 1000     | 6           | (50.0,97.0)            | (85.6,91.8)            | 94.6        | 8.4         | 96.5      | 99.5    |       |       |
|                                 |                    |          |          | 10          | (78.5,96.3)            | (87.6,91.1)            | 95.0        | 5.0         | 97.5      | 99.8    |       |       |
|                                 |                    |          |          | 20          | (83.6,93.7)            | (88.7,91.0)            | 95.2        | 3.1         | 97.0      | 100.1   |       |       |
|                                 |                    | 100      | 200      | 100         | 6                      | (50.0,97.0)            | (84.5,93.0) | 93.8        | 14.1      | 97.0    | 98.8  |       |
|                                 |                    |          |          |             | 10                     | (81.7,94.3)            | (86.4,92.1) | 94.4        | 9.5       | 97.8    | 99.4  |       |
|                                 |                    |          |          |             | 20                     | (85.2,93.1)            | (87.8,91.6) | 94.8        | 6.3       | 96.5    | 100.2 |       |
|                                 |                    |          |          |             | 500                    | 6                      | (55.1,97.0) | (85.1,92.2) | 94.3      | 11.7    | 97.4  | 98.8  |
|                                 |                    |          |          |             |                        | 10                     | (81.3,94.6) | (87.1,91.8) | 94.3      | 7.7     | 97.0  | 99.8  |
|                                 |                    |          |          |             |                        | 20                     | (85.5,92.9) | (88.1,91.3) | 95.2      | 5.1     | 97.5  | 100.0 |
|                                 |                    |          | 1000     | 500         | 100                    | 6                      | (50.0,97.0) | (86.1,92.0) | 94.2      | 9.0     | 96.8  | 99.4  |
|                                 |                    |          |          |             |                        | 10                     | (81.7,94.8) | (87.7,91.4) | 95.4      | 5.8     | 96.8  | 100.0 |
|                                 |                    |          |          |             |                        | 20                     | (85.6,92.8) | (88.8,91.0) | 95.3      | 3.7     | 97.4  | 100.1 |
|                                 |                    |          |          | 1000        | 100                    | 6                      | (50.0,96.8) | (86.7,91.4) | 95.6      | 6.8     | 97.7  | 99.3  |
|                                 |                    |          |          |             |                        | 10                     | (82.0,94.6) | (88.0,91.1) | 94.6      | 4.6     | 96.8  | 100.0 |
|                                 |                    |          |          |             |                        | 20                     | (85.5,93.0) | (89.1,90.9) | 94.5      | 2.9     | 97.9  | 100.2 |
| 200                             | 100                | 100      | 6        | (68.6,95.2) | (85.1,92.5)            | 94.6                   | 11.8        | 97.4        | 99.0      |         |       |       |
|                                 |                    |          | 10       | (84.8,93.3) | (87.1,92.0)            | 95.2                   | 8.1         | 97.8        | 99.9      |         |       |       |
|                                 |                    |          | 20       | (87.0,92.4) | (88.2,91.5)            | 94.5                   | 5.3         | 97.0        | 100.1     |         |       |       |
|                                 |                    |          | 200      | 6           | (62.9,95.2)            | (86.0,92.2)            | 94.6        | 9.6         | 97.0      | 99.3    |       |       |
|                                 |                    |          |          | 10          | (84.2,93.3)            | (87.6,91.6)            | 94.6        | 6.6         | 97.2      | 100.0   |       |       |
|                                 |                    |          |          | 20          | (87.0,92.2)            | (88.4,91.4)            | 94.2        | 4.4         | 96.9      | 100.3   |       |       |
|                                 | 500                | 200      | 100      | 6           | (70.6,95.1)            | (87.2,91.8)            | 95.4        | 7.8         | 97.2      | 99.9    |       |       |
|                                 |                    |          |          | 10          | (83.8,93.1)            | (88.2,91.3)            | 95.1        | 5.0         | 97.0      | 100.1   |       |       |
|                                 |                    |          |          | 20          | (87.0,92.2)            | (88.9,91.0)            | 94.4        | 3.4         | 96.8      | 100.1   |       |       |
|                                 |                    | 1000     | 200      | 100         | 6                      | (69.8,95.1)            | (87.3,91.5) | 95.4        | 6.2       | 98.0    | 99.9  |       |
|                                 |                    |          |          |             | 10                     | (84.4,93.1)            | (88.5,91.2) | 94.4        | 4.0       | 97.2    | 100.1 |       |
|                                 |                    |          |          |             | 20                     | (87.0,92.1)            | (89.2,90.8) | 94.6        | 2.6       | 97.0    | 100.2 |       |

| $e^{\beta^*}$                   | $\mathbf{x}^{opt}$ | $n_{1j}$ | $n_{2j}$ | $J$ | Table A.4: continued   |                        | SetCP95     | SetPerc%    | BandsCP95 | RelCost |      |       |
|---------------------------------|--------------------|----------|----------|-----|------------------------|------------------------|-------------|-------------|-----------|---------|------|-------|
|                                 |                    |          |          |     | PrOpt1<br>(Q2.5,Q97.5) | PrOpt2<br>(Q2.5,Q97.5) |             |             |           |         |      |       |
| Scenario 1 ( $J_1 = J_2 = 20$ ) |                    |          |          |     |                        |                        |             |             |           |         |      |       |
| (1.2, 1.5)                      | (2, 4.5)           | 50       | 100      | 6   | (56.9,91.6)            | (81.5,91.6)            | 94.0        | 24.4        | 95.8      | 97.6    |      |       |
|                                 |                    |          |          | 10  | (68.9,91.6)            | (85.2,91.6)            | 94.2        | 18.4        | 96.2      | 99.7    |      |       |
|                                 |                    |          |          | 20  | (81.1,91.6)            | (87.3,91.6)            | 94.8        | 13.3        | 96.0      | 100.3   |      |       |
|                                 |                    |          | 200      | 6   | (56.5,91.6)            | (83.3,91.6)            | 95.0        | 21.4        | 96.2      | 98.9    |      |       |
|                                 |                    |          |          | 10  | (70.7,91.6)            | (85.9,91.6)            | 95.5        | 15.1        | 96.6      | 100.3   |      |       |
|                                 |                    |          |          | 20  | (82.6,91.6)            | (88.1,91.6)            | 94.5        | 10.6        | 94.8      | 100.5   |      |       |
|                                 |                    |          | 500      | 6   | (56.7,91.6)            | (84.7,91.6)            | 94.8        | 17.4        | 96.8      | 99.4    |      |       |
|                                 |                    |          |          | 10  | (68.4,91.6)            | (87.1,91.6)            | 95.4        | 11.9        | 95.6      | 100.3   |      |       |
|                                 |                    |          |          | 20  | (81.9,91.6)            | (88.8,91.3)            | 95.1        | 7.6         | 95.9      | 100.4   |      |       |
|                                 |                    |          | 1000     | 6   | (56.5,91.6)            | (85.7,91.6)            | 95.1        | 14.9        | 95.9      | 100.0   |      |       |
|                                 |                    |          |          | 10  | (71.2,91.6)            | (88.0,91.6)            | 93.7        | 9.1         | 94.6      | 100.6   |      |       |
|                                 |                    |          |          | 20  | (81.4,91.6)            | (89.2,91.0)            | 94.9        | 5.6         | 94.2      | 100.2   |      |       |
|                                 |                    | 100      | 100      | 6   | (58.6,91.6)            | (83.0,91.6)            | 93.8        | 21.9        | 96.7      | 98.1    |      |       |
|                                 |                    |          |          | 10  | (79.4,91.6)            | (86.5,91.6)            | 94.5        | 16.8        | 96.3      | 100.1   |      |       |
|                                 |                    |          |          | 20  | (84.7,91.6)            | (87.9,91.6)            | 94.8        | 12.3        | 95.4      | 100.2   |      |       |
|                                 |                    |          | 200      | 6   | (59.0,91.6)            | (84.5,91.6)            | 94.6        | 19.1        | 96.4      | 99.1    |      |       |
|                                 |                    |          |          | 10  | (79.4,91.6)            | (86.9,91.6)            | 94.6        | 13.9        | 96.2      | 100.3   |      |       |
|                                 |                    |          |          | 20  | (84.4,91.6)            | (88.4,91.5)            | 94.9        | 9.9         | 94.9      | 100.4   |      |       |
|                                 |                    |          | 500      | 6   | (59.0,91.6)            | (85.9,91.6)            | 94.4        | 15.4        | 95.5      | 100.0   |      |       |
|                                 |                    |          |          | 10  | (78.6,91.6)            | (88.0,91.6)            | 95.4        | 10.7        | 95.8      | 100.5   |      |       |
|                                 |                    |          |          | 20  | (84.0,91.6)            | (89.0,91.1)            | 95.3        | 7.1         | 95.4      | 100.3   |      |       |
|                                 |                    |          | 1000     | 6   | (58.9,91.6)            | (86.3,91.6)            | 94.7        | 12.8        | 96.2      | 100.1   |      |       |
|                                 |                    |          |          | 10  | (77.4,91.6)            | (88.4,91.6)            | 94.6        | 8.3         | 95.0      | 100.5   |      |       |
|                                 |                    |          |          | 20  | (84.5,91.6)            | (89.3,90.8)            | 94.4        | 5.3         | 95.2      | 100.1   |      |       |
|                                 |                    | 200      | 100      | 6   | (59.0,91.6)            | (84.3,91.6)            | 95.0        | 19.5        | 96.4      | 99.1    |      |       |
|                                 |                    |          |          | 10  | (82.7,91.6)            | (87.0,91.6)            | 96.0        | 15.4        | 96.1      | 100.2   |      |       |
|                                 |                    |          |          | 20  | (86.7,91.6)            | (88.3,91.6)            | 93.7        | 11.1        | 95.0      | 100.0   |      |       |
|                                 |                    |          | 200      | 6   | (59,91.6)              | (85.8,91.6)            | 95.8        | 17.0        | 96.3      | 100.0   |      |       |
|                                 |                    |          |          | 10  | (81.1,91.6)            | (87.6,91.6)            | 94.5        | 12.9        | 95.2      | 100.2   |      |       |
|                                 |                    |          |          | 20  | (86.7,91.6)            | (88.8,91.2)            | 95.1        | 9.2         | 95.4      | 100.0   |      |       |
|                                 |                    |          | 500      | 6   | (59.0,91.6)            | (87.0,91.6)            | 95.1        | 13.4        | 95.6      | 100.4   |      |       |
|                                 |                    |          |          | 10  | (81.8,91.6)            | (88.3,91.5)            | 93.8        | 9.6         | 94.3      | 100.3   |      |       |
|                                 |                    |          |          | 20  | (86.6,91.6)            | (89.1,90.9)            | 94.4        | 6.7         | 94.7      | 100.1   |      |       |
|                                 |                    |          | 1000     | 6   | (59.0,91.6)            | (87.6,91.6)            | 95.4        | 11.0        | 95.8      | 100.2   |      |       |
|                                 |                    |          |          | 10  | (83.3,91.6)            | (88.9,91.2)            | 93.8        | 7.6         | 94.7      | 100.3   |      |       |
|                                 |                    |          |          | 20  | (87.1,91.6)            | (89.3,90.7)            | 95.0        | 5.0         | 95.0      | 100.1   |      |       |
|                                 |                    | (1.2, 2) | (2, 2.6) | 50  | 100                    | 6                      | (56.1,97.8) | (82.1,93.4) | 93.9      | 25.9    | 96.0 | 98.2  |
|                                 |                    |          |          |     |                        | 10                     | (75.5,95.0) | (85.5,92.2) | 95.2      | 20.2    | 97.0 | 99.3  |
|                                 |                    |          |          |     |                        | 20                     | (83.3,93.2) | (87.2,91.7) | 94.6      | 14.3    | 95.5 | 100.1 |
|                                 |                    |          |          |     | 200                    | 6                      | (56.6,97.4) | (83.4,92.8) | 94.8      | 22.8    | 95.9 | 98.5  |
|                                 |                    |          |          |     |                        | 10                     | (74.9,95.2) | (86.2,91.8) | 95.6      | 16.4    | 96.8 | 99.9  |
|                                 |                    |          |          |     |                        | 20                     | (83.4,93.4) | (87.8,91.3) | 95.4      | 11.5    | 96.3 | 100.3 |
|                                 |                    |          |          |     | 500                    | 6                      | (56.3,97.3) | (85.1,92.0) | 95.1      | 18.1    | 97.0 | 99.5  |
|                                 |                    |          |          |     |                        | 10                     | (76.9,95.2) | (87.3,91.4) | 95.4      | 12.2    | 97.0 | 100.1 |
|                                 |                    |          |          |     |                        | 20                     | (83.7,93.3) | (88.5,91.2) | 94.4      | 8.1     | 95.3 | 100.5 |
|                                 |                    |          |          |     | 1000                   | 6                      | (55.6,97.4) | (85.5,92.0) | 95.4      | 15.3    | 95.7 | 99.7  |
|                                 |                    |          |          |     |                        | 10                     | (75.0,95.2) | (87.7,91.2) | 95.1      | 9.5     | 95.9 | 100.2 |
|                                 |                    |          |          |     |                        | 20                     | (83.3,93.5) | (89.0,91.0) | 95.4      | 6.1     | 95.2 | 100.4 |
| 100                             | 100                |          |          | 6   | (58.0,96.2)            | (83.8,92.9)            | 95.2        | 23.6        | 97.2      | 98.9    |      |       |
|                                 |                    |          |          | 10  | (80.7,93.8)            | (86.2,92.0)            | 94.4        | 18.0        | 96.9      | 99.2    |      |       |
|                                 |                    |          |          | 20  | (85.6,92.4)            | (87.7,91.5)            | 95.6        | 12.4        | 96.0      | 100.1   |      |       |
|                                 | 200                |          |          | 6   | (58.7,95.6)            | (84.1,92.3)            | 95.0        | 20.1        | 96.8      | 98.7    |      |       |
|                                 |                    |          |          | 10  | (82.0,94.0)            | (86.7,91.7)            | 94.6        | 14.9        | 95.8      | 99.8    |      |       |
|                                 |                    |          |          | 20  | (85.5,92.4)            | (88.2,91.3)            | 94.3        | 10.2        | 95.8      | 100.3   |      |       |
|                                 | 500                |          |          | 6   | (59.0,96.6)            | (86.2,91.8)            | 95.7        | 15.8        | 96.4      | 99.7    |      |       |
|                                 |                    |          |          | 10  | (81.4,94.0)            | (87.7,91.3)            | 96.2        | 11.3        | 96.6      | 100.1   |      |       |
|                                 |                    |          |          | 20  | (85.3,92.5)            | (88.7,91.1)            | 95.1        | 7.5         | 95.8      | 100.4   |      |       |
|                                 | 1000               |          |          | 6   | (58.5,95.4)            | (86.1,91.4)            | 95.1        | 13.1        | 96.3      | 99.6    |      |       |
|                                 |                    |          |          | 10  | (80.4,93.8)            | (88.1,91.2)            | 94.7        | 9.0         | 95.4      | 100.2   |      |       |
|                                 |                    |          |          | 20  | (85.6,92.4)            | (89.1,91.0)            | 95.2        | 5.7         | 94.6      | 100.3   |      |       |
| 200                             | 100                |          |          | 6   | (66.0,94.6)            | (85.0,92.5)            | 95.0        | 20.2        | 96.4      | 98.7    |      |       |
|                                 |                    |          |          | 10  | (84.2,92.8)            | (86.9,91.7)            | 94.7        | 15.2        | 96.6      | 99.6    |      |       |
|                                 |                    |          |          | 20  | (87.2,91.9)            | (88.1,91.4)            | 94.5        | 10.5        | 95.8      | 100.1   |      |       |
|                                 | 200                |          |          | 6   | (59.2,94.4)            | (85.8,92.0)            | 96.0        | 17.8        | 96.7      | 99.3    |      |       |
|                                 |                    |          |          | 10  | (83.8,92.6)            | (87.4,91.6)            | 94.5        | 13.1        | 95.8      | 99.9    |      |       |
|                                 |                    |          |          | 20  | (87.0,91.7)            | (88.5,91.2)            | 93.8        | 9.0         | 95.0      | 100.1   |      |       |
|                                 | 500                |          |          | 6   | (68.1,94.4)            | (86.5,91.5)            | 95.2        | 14.0        | 96.8      | 99.7    |      |       |
|                                 |                    |          |          | 10  | (83.9,92.7)            | (88.1,91.3)            | 94.6        | 10.2        | 95.5      | 100.2   |      |       |
|                                 |                    |          |          | 20  | (86.8,91.8)            | (88.9,90.9)            | 93.9        | 6.8         | 94.4      | 100.1   |      |       |
|                                 | 1000               |          |          | 6   | (66.6,94.1)            | (87.5,91.4)            | 95.0        | 11.5        | 95.8      | 100.1   |      |       |
|                                 |                    |          |          | 10  | (84.3,92.7)            | (88.6,91.1)            | 96.0        | 8.0         | 95.8      | 100.5   |      |       |
|                                 |                    |          |          | 20  | (87.1,91.8)            | (89.3,90.8)            | 95.0        | 5.3         | 95.4      | 100.2   |      |       |



Table A5: Simulation results: mean estimated success probability achieved under the estimated optimal package ( $p_{\hat{\mathbf{x}}^{opt}}(\hat{\beta})$ ), mean true success probability achieved under the estimated optimal package and ( $p_{\hat{\mathbf{x}}^{opt}}(\beta^*)$ ), and mean estimated success probability achieved under the true optimal package ( $p_{\mathbf{x}^{opt}}(\hat{\beta})$ ). Unit costs were  $c_1 = 1$  and  $c_2 = 8$ . All results are multiplied by 100.

| $\exp(\beta^*)$ | $n_{1j}$ | $n_{2j}$   | J    | $p_{\hat{\mathbf{x}}^{opt}}(\hat{\beta})$<br>( $\times 100$ ) | $p_{\hat{\mathbf{x}}^{opt}}(\beta^*)$<br>( $\times 100$ ) | $p_{\mathbf{x}^{opt}}(\hat{\beta})$<br>( $\times 100$ ) |       |       |       |
|-----------------|----------|------------|------|---------------------------------------------------------------|-----------------------------------------------------------|---------------------------------------------------------|-------|-------|-------|
| (1, 2)          | 50       | 100        | 6    | 89.98                                                         | 88.86                                                     | 89.61                                                   |       |       |       |
|                 |          |            | 10   | 90.00                                                         | 89.29                                                     | 89.82                                                   |       |       |       |
|                 |          |            | 20   | 90.00                                                         | 89.63                                                     | 89.86                                                   |       |       |       |
|                 |          |            | 200  | 6                                                             | 89.98                                                     | 88.89                                                   | 89.62 |       |       |
|                 |          |            |      | 10                                                            | 90.00                                                     | 89.51                                                   | 89.79 |       |       |
|                 |          |            |      | 20                                                            | 90.00                                                     | 89.75                                                   | 89.90 |       |       |
|                 |          | 500        | 6    | 89.96                                                         | 89.42                                                     | 89.70                                                   |       |       |       |
|                 |          |            | 10   | 90.00                                                         | 89.62                                                     | 89.96                                                   |       |       |       |
|                 |          |            | 20   | 90.00                                                         | 89.83                                                     | 89.94                                                   |       |       |       |
|                 |          |            | 1000 | 6                                                             | 89.99                                                     | 89.48                                                   | 89.81 |       |       |
|                 |          |            |      | 10                                                            | 90.00                                                     | 89.75                                                   | 89.95 |       |       |
|                 |          |            |      | 20                                                            | 90.00                                                     | 89.91                                                   | 89.96 |       |       |
|                 |          | 100        | 100  | 6                                                             | 89.95                                                     | 88.91                                                   | 89.64 |       |       |
|                 |          |            |      | 10                                                            | 90.00                                                     | 89.51                                                   | 89.86 |       |       |
|                 |          |            |      | 20                                                            | 90.00                                                     | 89.78                                                   | 89.91 |       |       |
|                 |          |            |      | 200                                                           | 6                                                         | 90.00                                                   | 89.25 | 89.90 |       |
|                 |          |            |      |                                                               | 10                                                        | 90.00                                                   | 89.64 | 89.82 |       |
|                 |          |            |      |                                                               | 20                                                        | 90.00                                                   | 89.83 | 89.95 |       |
|                 |          |            | 500  | 6                                                             | 89.97                                                     | 89.54                                                   | 89.74 |       |       |
|                 |          |            |      | 10                                                            | 90.00                                                     | 89.75                                                   | 89.86 |       |       |
|                 |          |            |      | 20                                                            | 90.00                                                     | 89.90                                                   | 89.99 |       |       |
|                 |          |            |      | 1000                                                          | 6                                                         | 90.00                                                   | 89.55 | 89.92 |       |
|                 |          |            |      |                                                               | 10                                                        | 90.00                                                   | 89.83 | 89.91 |       |
|                 |          |            |      |                                                               | 20                                                        | 90.00                                                   | 89.99 | 89.95 |       |
|                 | 200      |            | 100  | 6                                                             | 90.00                                                     | 89.28                                                   | 89.84 |       |       |
|                 |          |            |      | 10                                                            | 90.00                                                     | 89.69                                                   | 89.82 |       |       |
|                 |          |            |      | 20                                                            | 90.00                                                     | 89.87                                                   | 89.92 |       |       |
|                 |          |            |      | 200                                                           | 6                                                         | 90.00                                                   | 89.44 | 89.81 |       |
|                 |          |            |      |                                                               | 10                                                        | 90.00                                                   | 89.71 | 89.88 |       |
|                 |          |            |      |                                                               | 20                                                        | 90.00                                                   | 89.97 | 89.90 |       |
|                 |          |            | 500  | 6                                                             | 90.00                                                     | 89.59                                                   | 89.87 |       |       |
|                 |          |            |      | 10                                                            | 90.00                                                     | 89.86                                                   | 89.87 |       |       |
|                 |          |            |      | 20                                                            | 90.00                                                     | 89.94                                                   | 89.98 |       |       |
|                 |          |            |      | 1000                                                          | 6                                                         | 90.00                                                   | 89.71 | 89.79 |       |
|                 |          |            |      |                                                               | 10                                                        | 90.00                                                   | 89.89 | 89.94 |       |
|                 |          |            |      |                                                               | 20                                                        | 90.00                                                   | 89.99 | 89.97 |       |
|                 |          | (1.2, 1.5) | 50   | 100                                                           | 6                                                         | 89.31                                                   | 88.70 | 89.03 |       |
|                 |          |            |      |                                                               | 10                                                        | 89.72                                                   | 89.45 | 89.60 |       |
|                 |          |            |      |                                                               | 20                                                        | 89.95                                                   | 89.90 | 89.85 |       |
|                 |          |            |      |                                                               | 200                                                       | 6                                                       | 89.34 | 89.14 | 88.93 |
|                 |          |            |      |                                                               |                                                           | 10                                                      | 89.83 | 89.73 | 89.50 |
|                 |          |            |      |                                                               |                                                           | 20                                                      | 89.98 | 90.01 | 89.87 |
|                 |          |            |      | 500                                                           | 6                                                         | 89.64                                                   | 89.49 | 89.31 |       |
|                 |          |            |      |                                                               | 10                                                        | 89.92                                                   | 89.85 | 89.86 |       |
|                 |          |            |      |                                                               | 20                                                        | 90.00                                                   | 89.98 | 89.95 |       |
|                 |          |            |      |                                                               | 1000                                                      | 6                                                       | 89.74 | 89.66 | 89.47 |
|                 |          |            |      |                                                               |                                                           | 10                                                      | 89.94 | 89.97 | 89.76 |
|                 |          |            |      |                                                               |                                                           | 20                                                      | 90.00 | 90.00 | 89.97 |
| 100             | 100      |            |      | 6                                                             | 89.49                                                     | 88.99                                                   | 89.34 |       |       |
|                 |          |            |      | 10                                                            | 89.88                                                     | 89.76                                                   | 89.80 |       |       |
|                 |          |            |      | 20                                                            | 89.98                                                     | 89.94                                                   | 89.93 |       |       |
|                 |          |            |      | 200                                                           | 6                                                         | 89.65                                                   | 89.47 | 89.43 |       |
|                 |          |            |      |                                                               | 10                                                        | 89.92                                                   | 89.88 | 89.79 |       |
|                 |          |            |      |                                                               | 20                                                        | 90.00                                                   | 90.02 | 89.91 |       |
|                 | 500      |            |      | 6                                                             | 89.87                                                     | 89.64                                                   | 89.78 |       |       |
|                 |          |            |      | 10                                                            | 89.96                                                     | 89.97                                                   | 89.84 |       |       |
|                 |          |            |      | 20                                                            | 90.00                                                     | 90.06                                                   | 89.91 |       |       |
|                 |          |            |      | 1000                                                          | 6                                                         | 89.88                                                   | 89.77 | 89.65 |       |
|                 |          |            |      |                                                               | 10                                                        | 89.95                                                   | 90.04 | 89.81 |       |
|                 |          |            |      |                                                               | 20                                                        | 90.00                                                   | 90.01 | 89.97 |       |
|                 | 200      |            | 100  | 6                                                             | 89.69                                                     | 89.44                                                   | 89.58 |       |       |
|                 |          |            |      | 10                                                            | 89.93                                                     | 89.88                                                   | 89.88 |       |       |
|                 |          |            |      | 20                                                            | 89.99                                                     | 89.92                                                   | 90.03 |       |       |
|                 |          |            |      | 200                                                           | 6                                                         | 89.85                                                   | 89.78 | 89.69 |       |
|                 |          |            |      |                                                               | 10                                                        | 89.94                                                   | 89.91 | 89.86 |       |
|                 |          |            |      |                                                               | 20                                                        | 90.00                                                   | 89.97 | 89.99 |       |
|                 |          |            | 500  | 6                                                             | 89.91                                                     | 89.79                                                   | 89.76 |       |       |
|                 |          |            |      | 10                                                            | 89.99                                                     | 89.99                                                   | 89.89 |       |       |
|                 |          |            |      | 20                                                            | 90.00                                                     | 90.00                                                   | 89.98 |       |       |
|                 |          |            |      | 1000                                                          | 6                                                         | 89.89                                                   | 89.88 | 89.78 |       |
|                 |          |            |      |                                                               | 10                                                        | 89.99                                                   | 90.03 | 89.91 |       |
|                 |          |            |      |                                                               | 20                                                        | 90.00                                                   | 90.01 | 89.98 |       |

| $\exp(\boldsymbol{\beta}^*)$ | $n_{1j}$ | $n_{2j}$ | J     | $\overline{p_{\hat{\mathbf{x}}^{opt}}(\hat{\boldsymbol{\beta}})}$<br>( $\times 100$ ) | $\overline{p_{\hat{\mathbf{x}}^{opt}}(\boldsymbol{\beta}^*)}$<br>( $\times 100$ ) | $\overline{p_{\mathbf{x}^{opt}}(\hat{\boldsymbol{\beta}})}$<br>( $\times 100$ ) |
|------------------------------|----------|----------|-------|---------------------------------------------------------------------------------------|-----------------------------------------------------------------------------------|---------------------------------------------------------------------------------|
| (1.2, 2)                     | 50       | 100      | 6     | 89.92                                                                                 | 88.72                                                                             | 89.04                                                                           |
|                              |          |          | 10    | 90.00                                                                                 | 89.27                                                                             | 89.69                                                                           |
|                              |          |          | 20    | 90.00                                                                                 | 89.68                                                                             | 89.81                                                                           |
|                              |          | 200      | 6     | 89.97                                                                                 | 88.95                                                                             | 89.38                                                                           |
|                              |          |          | 10    | 90.00                                                                                 | 89.46                                                                             | 89.65                                                                           |
|                              |          |          | 20    | 90.00                                                                                 | 89.84                                                                             | 89.83                                                                           |
|                              |          | 500      | 6     | 90.00                                                                                 | 89.32                                                                             | 89.37                                                                           |
|                              |          |          | 10    | 90.00                                                                                 | 89.72                                                                             | 89.73                                                                           |
|                              |          |          | 20    | 90.00                                                                                 | 89.94                                                                             | 89.83                                                                           |
|                              | 100      | 1000     | 6     | 90.00                                                                                 | 89.41                                                                             | 89.62                                                                           |
|                              |          |          | 10    | 90.00                                                                                 | 89.82                                                                             | 89.78                                                                           |
|                              |          |          | 20    | 90.00                                                                                 | 90.00                                                                             | 89.89                                                                           |
|                              |          | 100      | 6     | 90.00                                                                                 | 89.08                                                                             | 89.57                                                                           |
|                              |          |          | 10    | 90.00                                                                                 | 89.47                                                                             | 89.78                                                                           |
|                              |          |          | 20    | 90.00                                                                                 | 89.77                                                                             | 89.90                                                                           |
|                              |          | 200      | 6     | 89.97                                                                                 | 89.13                                                                             | 89.53                                                                           |
|                              |          |          | 10    | 90.00                                                                                 | 89.63                                                                             | 89.76                                                                           |
|                              |          |          | 20    | 90.00                                                                                 | 89.87                                                                             | 89.89                                                                           |
|                              | 500      | 6        | 90.00 | 89.53                                                                                 | 89.63                                                                             |                                                                                 |
|                              |          | 10       | 90.00 | 89.76                                                                                 | 89.82                                                                             |                                                                                 |
|                              |          | 20       | 90.00 | 90.00                                                                                 | 89.87                                                                             |                                                                                 |
|                              | 200      | 1000     | 6     | 90.00                                                                                 | 89.59                                                                             | 89.67                                                                           |
|                              |          |          | 10    | 90.00                                                                                 | 89.90                                                                             | 89.87                                                                           |
|                              |          |          | 20    | 90.00                                                                                 | 90.00                                                                             | 89.92                                                                           |
|                              |          | 100      | 6     | 90.00                                                                                 | 89.26                                                                             | 89.54                                                                           |
|                              |          |          | 10    | 90.00                                                                                 | 89.61                                                                             | 89.86                                                                           |
|                              |          |          | 20    | 90.00                                                                                 | 89.92                                                                             | 89.93                                                                           |
|                              |          | 200      | 6     | 90.00                                                                                 | 89.44                                                                             | 89.76                                                                           |
|                              |          |          | 10    | 90.00                                                                                 | 89.75                                                                             | 89.90                                                                           |
|                              |          |          | 20    | 90.00                                                                                 | 89.92                                                                             | 89.97                                                                           |
|                              | 500      | 6        | 90.00 | 89.58                                                                                 | 89.76                                                                             |                                                                                 |
|                              |          | 10       | 90.00 | 89.86                                                                                 | 89.88                                                                             |                                                                                 |
|                              |          | 20       | 90.00 | 89.97                                                                                 | 89.97                                                                             |                                                                                 |
|                              | 1000     | 6        | 90.00 | 89.72                                                                                 | 89.73                                                                             |                                                                                 |
|                              |          | 10       | 90.00 | 89.97                                                                                 | 89.86                                                                             |                                                                                 |
|                              |          | 20       | 90.00 | 90.00                                                                                 | 89.98                                                                             |                                                                                 |

Table A6: Simulation results for estimated optimal package. Analogue of Table 2 in the main paper and Table A3 here when unit costs were  $c_1 = 1$  and  $c_2 = 6$ . Results include bias for optimal individual components (times 100) and empirical mean squared error (times 100) of the second-stage recommended intervention and the final estimated optimal package.

| $e^{\beta^*}$                  | $\mathbf{x}^{opt}$ | $n_{1j}$                             | $n_{2j}$ | $J$ | Stage 1                               |                                       |                          | Stage 2                               |                                       |                          |       |       |       |
|--------------------------------|--------------------|--------------------------------------|----------|-----|---------------------------------------|---------------------------------------|--------------------------|---------------------------------------|---------------------------------------|--------------------------|-------|-------|-------|
|                                |                    |                                      |          |     | Bias <sub>1</sub><br>( $\times 100$ ) | Bias <sub>2</sub><br>( $\times 100$ ) | RMSE<br>( $\times 100$ ) | Bias <sub>1</sub><br>( $\times 100$ ) | Bias <sub>2</sub><br>( $\times 100$ ) | RMSE<br>( $\times 100$ ) |       |       |       |
| Scenario 1 ( $J_1 = J_2 = J$ ) |                    |                                      |          |     |                                       |                                       |                          |                                       |                                       |                          |       |       |       |
| (1, 2)                         | (0, 3.2)           | 50                                   | 100      | 6   | 68.5                                  | -46.0                                 | 166.6                    | 47.3                                  | -12.8                                 | 107.3                    |       |       |       |
|                                |                    |                                      |          | 10  | 56.1                                  | -19.2                                 | 126.6                    | 33.5                                  | -7.3                                  | 86.3                     |       |       |       |
|                                |                    |                                      |          | 20  | 41.8                                  | -8.4                                  | 100.3                    | 22.6                                  | -3.3                                  | 69.8                     |       |       |       |
|                                |                    |                                      |          | 500 | 6                                     | 69.6                                  | -47.0                    | 166.8                                 | 32.7                                  | -6.7                     | 86.9  |       |       |
|                                |                    |                                      |          |     | 10                                    | 61.4                                  | -18.6                    | 129.8                                 | 19.2                                  | -3.5                     | 64.3  |       |       |
|                                |                    |                                      |          |     | 20                                    | 41.6                                  | -9.9                     | 100.2                                 | 8.2                                   | -0.9                     | 41.9  |       |       |
|                                |                    | 100                                  | 100      | 6   | 63.5                                  | -29.7                                 | 146.1                    | 42.6                                  | -9.3                                  | 99.7                     |       |       |       |
|                                |                    |                                      |          | 10  | 44.6                                  | -13.2                                 | 106.9                    | 27.4                                  | -5.4                                  | 77.8                     |       |       |       |
|                                |                    |                                      |          | 20  | 24.6                                  | -4.3                                  | 76.7                     | 13.5                                  | -1.5                                  | 54.3                     |       |       |       |
|                                |                    |                                      |          | 500 | 6                                     | 64.4                                  | -31.5                    | 147.2                                 | 30.4                                  | -5.7                     | 82.2  |       |       |
|                                |                    |                                      |          |     | 10                                    | 51.9                                  | -10.8                    | 114.6                                 | 15.9                                  | -2.0                     | 58.4  |       |       |
|                                |                    |                                      |          |     | 20                                    | 25.9                                  | -5.6                     | 78.1                                  | 3.6                                   | -0.2                     | 28.4  |       |       |
|                                |                    | (1.2, 1.5)                           | (2, 4.5) | 50  | 100                                   | 6                                     | -71.8                    | -87.7                                 | 210.0                                 | -40.2                    | -6.5  | 108.3 |       |
|                                |                    |                                      |          |     |                                       | 10                                    | -53.2                    | -35.7                                 | 145.8                                 | -30.1                    | 2.8   | 85.7  |       |
|                                |                    |                                      |          |     |                                       | 20                                    | -35.5                    | -9.0                                  | 99.8                                  | -12.5                    | 3.5   | 56.9  |       |
|                                |                    |                                      |          |     |                                       | 500                                   | 6                        | -73.2                                 | -90.3                                 | 211.4                    | -27.2 | 0.6   | 85.9  |
|                                |                    |                                      |          |     |                                       |                                       | 10                       | -54.7                                 | -35.6                                 | 146.9                    | -12.5 | 3.2   | 56.3  |
|                                |                    |                                      |          |     |                                       |                                       | 20                       | -36.8                                 | -8.9                                  | 100.6                    | -4.3  | 2.5   | 32.9  |
| 100                            | 100                |                                      |          | 6   | -58.6                                 | -56.5                                 | 176.2                    | -36.1                                 | -4.1                                  | 101.2                    |       |       |       |
|                                |                    |                                      |          | 10  | -37.6                                 | -14.4                                 | 108.8                    | -17.6                                 | 3.1                                   | 67.6                     |       |       |       |
|                                |                    |                                      |          | 20  | -21.0                                 | -2.2                                  | 76.7                     | -6.3                                  | 1.8                                   | 42.0                     |       |       |       |
|                                |                    |                                      |          | 500 | 6                                     | -56.1                                 | -57.3                    | 173.6                                 | -23.4                                 | 3.2                      | 75.5  |       |       |
|                                |                    |                                      |          |     | 10                                    | -38.8                                 | -17.0                    | 113.7                                 | -8.9                                  | 3.8                      | 47.2  |       |       |
|                                |                    |                                      |          |     | 20                                    | -22.2                                 | -1.7                     | 78.0                                  | -1.4                                  | 2.1                      | 21.6  |       |       |
| (1.2, 2)                       | (2, 2.6)           |                                      |          | 50  | 100                                   | 6                                     | -90.3                    | -26.6                                 | 170.4                                 | -80.5                    | 5.3   | 135.0 |       |
|                                |                    |                                      |          |     |                                       | 10                                    | -79.7                    | -5.1                                  | 141.4                                 | -68.2                    | 7.2   | 120.6 |       |
|                                |                    |                                      |          |     |                                       | 20                                    | -64.9                    | 1.7                                   | 119.6                                 | -51.6                    | 7.6   | 104.4 |       |
|                                |                    |                                      |          |     |                                       | 500                                   | 6                        | -87.8                                 | -26.0                                 | 168.2                    | -64.9 | 6.8   | 119.1 |
|                                |                    |                                      |          |     |                                       |                                       | 10                       | -78.7                                 | -5.5                                  | 140.0                    | -48.9 | 7.0   | 101.7 |
|                                |                    |                                      |          |     |                                       |                                       | 20                       | -66.0                                 | 2.7                                   | 120.3                    | -31.2 | 6.0   | 81.3  |
|                                |                    | 100                                  | 100      | 6   | -81.1                                 | -15.4                                 | 152.8                    | -67.9                                 | 5.9                                   | 122.5                    |       |       |       |
|                                |                    |                                      |          | 10  | -64.3                                 | -0.7                                  | 122.3                    | -54.1                                 | 5.1                                   | 107.2                    |       |       |       |
|                                |                    |                                      |          | 20  | -53.0                                 | 4.2                                   | 106.3                    | -40.5                                 | 6.3                                   | 92.4                     |       |       |       |
|                                |                    |                                      |          | 500 | 6                                     | -81.8                                 | -11.1                    | 151.5                                 | -58.0                                 | 6.8                      | 111.2 |       |       |
|                                |                    |                                      |          |     | 10                                    | -65.3                                 | 0.1                      | 123.1                                 | -40.7                                 | 6.1                      | 92.6  |       |       |
|                                |                    |                                      |          |     | 20                                    | -52.2                                 | 4.2                      | 105.7                                 | -24.2                                 | 4.9                      | 71.5  |       |       |
|                                |                    | Scenario 2a ( $J_1 = 6, J_2 = 12$ )  |          |     |                                       |                                       |                          |                                       |                                       |                          |       |       |       |
|                                |                    | (1, 2)                               | (0, 3.2) | 50  | 200                                   |                                       | 70.7                     | -43.8                                 | 168.2                                 | 29.5                     | -6.2  | 81.6  |       |
|                                |                    | (1.2, 1.5)                           | (2, 4.5) |     |                                       |                                       | -69.4                    | -95.4                                 | 214.4                                 | -24.9                    | 0.5   | 79.9  |       |
|                                |                    | (1.2, 2)                             | (2, 2.6) |     |                                       |                                       | -91.5                    | -32.9                                 | 173.5                                 | -62.0                    | 5.9   | 115.6 |       |
|                                |                    | Scenario 2b ( $J_1 = 10, J_2 = 20$ ) |          |     |                                       |                                       |                          |                                       |                                       |                          |       |       |       |
|                                |                    | (1, 2)                               | (0, 3.2) | 50  | 200                                   |                                       | 64.5                     | -18.6                                 | 133.3                                 | 33.5                     | -5.0  | 83.8  |       |
| (1.2, 1.5)                     | (2, 4.5)           |                                      |          |     | -47.8                                 | -35.1                                 | 141.8                    | -10.0                                 | 2.4                                   | 52.5                     |       |       |       |
| (1.2, 2)                       | (2, 2.6)           |                                      |          |     | -69.0                                 | -6.6                                  | 134.6                    | -33.4                                 | 3.9                                   | 84.2                     |       |       |       |

Table A7: Simulation results for estimated optimal package. Analogue of Table 3 in the main paper and Table A4 here when unit costs were  $c_1 = 1$  and  $c_2 = 6$ . Results include empirical 2.5% and 97.5% quantiles of true success rate of second-stage recommended intervention (PrOpt1) and final estimated optimal intervention (PrOpt2), coverage rate of 95% confidence set for optimal intervention package (SetCP95), and its relative size (SetPerc%). Results also include the coverage rate of 95% confidence bands for outcome probability under all values on a grid of  $\mathcal{X}$  (BandsCP95) and the ratio between the mean cost of the estimated optimal intervention and the cost of the optimal true intervention (RelCost).

| $e^{\beta^*}$                        | $\mathbf{x}^{opt}$ | $n_{1j}$ | $n_{2j}$ | $J$ | PrOpt1<br>(Q2.5,Q97.5) | PrOpt2<br>(Q2.5,Q97.5) | SetCP95     | SetPerc% | BandsCP95 | RelCost |       |
|--------------------------------------|--------------------|----------|----------|-----|------------------------|------------------------|-------------|----------|-----------|---------|-------|
| Scenario 1 ( $J_1 = J_2 = 20$ )      |                    |          |          |     |                        |                        |             |          |           |         |       |
| (1, 2)                               | (0, 3.2)           | 50       | 100      | 6   | (50.0,97.0)            | (82.5,93.6)            | 92.9        | 16.4     | 97.9      | 98.4    |       |
|                                      |                    |          |          | 10  | (77.1,96.0)            | (85.8,92.4)            | 94.8        | 11.3     | 97.4      | 99.5    |       |
|                                      |                    |          |          | 20  | (83.6,93.9)            | (87.3,91.9)            | 94.0        | 7.5      | 97.0      | 100.2   |       |
|                                      |                    |          |          | 500 | 6                      | (50.0,97.0)            | (85.0,92.4) | 94.0     | 10.2      | 97.4    | 99.6  |
|                                      |                    |          |          |     | 10                     | (78.1,95.9)            | (87.0,91.6) | 94.6     | 6.4       | 96.9    | 99.9  |
|                                      |                    |          |          |     | 20                     | (83.5,93.8)            | (88.3,91.2) | 94.8     | 4.0       | 97.4    | 100.1 |
|                                      |                    | 100      | 100      | 6   | (50.0,97.0)            | (84.5,93.1)            | 93.7        | 14.0     | 97.0      | 99.3    |       |
|                                      |                    |          |          | 10  | (81.7,94.3)            | (86.4,92.3)            | 94.6        | 9.4      | 97.9      | 99.7    |       |
|                                      |                    |          |          | 20  | (85.2,93.2)            | (87.8,91.7)            | 94.9        | 6.2      | 96.8      | 100.2   |       |
|                                      |                    |          |          | 500 | 6                      | (50.0,97.0)            | (86.0,92.1) | 94.2     | 9.0       | 97.0    | 99.8  |
|                                      |                    |          |          |     | 10                     | (81.7,94.9)            | (87.7,91.5) | 95.4     | 5.8       | 96.8    | 100.2 |
|                                      |                    |          |          |     | 20                     | (85.6,92.9)            | (88.9,91.1) | 95.3     | 3.7       | 97.7    | 100.1 |
| (1.2, 1.5)                           | (2, 4.5)           | 50       | 100      | 6   | (56.9,91.6)            | (81.3,91.6)            | 94.0        | 24.4     | 95.8      | 97.3    |       |
|                                      |                    |          |          | 10  | (68.9,91.6)            | (85.2,91.6)            | 94.4        | 18.4     | 96.2      | 99.5    |       |
|                                      |                    |          |          | 20  | (81.0,91.6)            | (87.3,91.6)            | 95.0        | 13.2     | 96.2      | 100.3   |       |
|                                      |                    |          |          | 500 | 6                      | (56.7,91.6)            | (84.7,91.6) | 94.8     | 17.4      | 96.8    | 99.2  |
|                                      |                    |          |          |     | 10                     | (68.4,91.6)            | (87.0,91.6) | 95.5     | 11.8      | 95.6    | 100.2 |
|                                      |                    |          |          |     | 20                     | (81.8,91.6)            | (88.7,91.3) | 95.1     | 7.6       | 95.9    | 100.4 |
|                                      |                    | 100      | 100      | 6   | (58.6,91.6)            | (83.0,91.6)            | 94.0        | 21.9     | 96.8      | 97.9    |       |
|                                      |                    |          |          | 10  | (79.4,91.6)            | (86.4,91.6)            | 94.8        | 16.7     | 96.3      | 100.0   |       |
|                                      |                    |          |          | 20  | (84.6,91.6)            | (87.8,91.6)            | 94.9        | 12.2     | 95.5      | 100.2   |       |
|                                      |                    |          |          | 500 | 6                      | (59.0,91.6)            | (85.6,91.6) | 94.3     | 15.4      | 95.5    | 99.9  |
|                                      |                    |          |          |     | 10                     | (78.5,91.6)            | (87.7,91.6) | 95.5     | 10.6      | 95.8    | 100.5 |
|                                      |                    |          |          |     | 20                     | (83.9,91.6)            | (89.0,91.0) | 95.4     | 7.1       | 95.7    | 100.4 |
| (1.2, 2)                             | (2, 2.6)           | 50       | 100      | 6   | (56.1,97.8)            | (82.1,93.3)            | 94.2        | 25.9     | 96.1      | 97.3    |       |
|                                      |                    |          |          | 10  | (75.5,95.0)            | (85.6,92.2)            | 95.4        | 20.1     | 97.0      | 98.6    |       |
|                                      |                    |          |          | 20  | (83.2,93.1)            | (87.1,91.6)            | 95.0        | 14.2     | 95.6      | 99.7    |       |
|                                      |                    |          |          | 500 | 6                      | (56.3,97.3)            | (85.0,91.9) | 95.1     | 18.1      | 96.9    | 98.7  |
|                                      |                    |          |          |     | 10                     | (76.9,95.2)            | (87.3,91.2) | 95.4     | 12.2      | 96.8    | 99.6  |
|                                      |                    |          |          |     | 20                     | (83.7,93.3)            | (88.3,91.0) | 94.6     | 8.1       | 95.4    | 100.3 |
|                                      |                    | 100      | 100      | 6   | (58.0,96.2)            | (83.8,92.9)            | 95.4        | 23.4     | 97.2      | 98.2    |       |
|                                      |                    |          |          | 10  | (80.7,93.8)            | (86.2,91.9)            | 94.6        | 17.9     | 96.8      | 98.7    |       |
|                                      |                    |          |          | 20  | (85.6,92.4)            | (87.6,91.4)            | 95.7        | 12.4     | 95.8      | 99.8    |       |
|                                      |                    |          |          | 500 | 6                      | (59.0,96.6)            | (86.2,91.7) | 95.5     | 15.8      | 96.4    | 99.0  |
|                                      |                    |          |          |     | 10                     | (81.4,94.0)            | (87.6,91.2) | 96.3     | 11.3      | 96.5    | 99.8  |
|                                      |                    |          |          |     | 20                     | (85.2,92.3)            | (88.5,90.9) | 95.4     | 7.4       | 95.8    | 100.3 |
| Scenario 2a ( $J_1 = 6, J_2 = 12$ )  |                    |          |          |     |                        |                        |             |          |           |         |       |
| (1, 2)                               | (0, 3.2)           | 50       | 200      |     | (50,97)                | (85.7,92.5)            | 94.2        | 9.7      | 97.0      | 99.6    |       |
| (1.2, 1.5)                           | (2, 4.5)           |          |          |     | (56.3,91.6)            | (85.4,91.6)            | 94.6        | 17.5     | 96.4      | 99.3    |       |
| (1.2, 2)                             | (2, 2.6)           |          |          |     | (55.7,97.9)            | (85.2,91.9)            | 95.0        | 17.4     | 95.8      | 98.5    |       |
| Scenario 2b ( $J_1 = 10, J_2 = 20$ ) |                    |          |          |     |                        |                        |             |          |           |         |       |
| (1, 2)                               | (0, 3.2)           | 50       | 200      |     | (77.5,95.8)            | (87.1,91.5)            | 94.6        | 6.4      | 97.2      | 99.7    |       |
| (1.2, 1.5)                           | (2, 4.5)           |          |          |     | (71.3,91.6)            | (87.2,91.6)            | 95.2        | 12.0     | 95.7      | 100.2   |       |
| (1.2, 2)                             | (2, 2.6)           |          |          |     | (75.9,95.6)            | (87.1,91.4)            | 95.8        | 12.6     | 96.8      | 99.9    |       |

Table A8: Simulation results for estimated optimal package under nonlinear cost function  $C(\mathbf{x}) = x_1 + 5x_2 + 3 \exp(-0.5x_2)$ . Results include bias for optimal individual components (times 100) and empirical mean squared error (times 100) of the second-stage recommended package and the final estimated optimal package.

| $e^{\beta^*}$ | $\mathbf{x}^{opt}$ | $n_{1j}$ | $n_{2j}$ | $J$  | Stage 1                               |                                       |                          | Stage 2                               |                                       |                          |      |      |
|---------------|--------------------|----------|----------|------|---------------------------------------|---------------------------------------|--------------------------|---------------------------------------|---------------------------------------|--------------------------|------|------|
|               |                    |          |          |      | Bias <sub>1</sub><br>( $\times 100$ ) | Bias <sub>2</sub><br>( $\times 100$ ) | RMSE<br>( $\times 100$ ) | Bias <sub>1</sub><br>( $\times 100$ ) | Bias <sub>2</sub><br>( $\times 100$ ) | RMSE<br>( $\times 100$ ) |      |      |
| (1, 2)        | (0, 3.2)           | 50       | 100      | 6    | 69.3                                  | -47.7                                 | 164.8                    | 40.5                                  | -9.5                                  | 94.8                     |      |      |
|               |                    |          |          | 10   | 52.4                                  | -15.5                                 | 120.4                    | 29.9                                  | -5.1                                  | 75.6                     |      |      |
|               |                    |          |          | 20   | 31.3                                  | -6.2                                  | 84.0                     | 16.6                                  | -1.6                                  | 52.5                     |      |      |
|               |                    |          |          | 200  | 6                                     | 65.7                                  | -43.7                    | 161.5                                 | 32.5                                  | -7.7                     | 83.6 |      |
|               |                    |          |          |      | 10                                    | 54.3                                  | -16.2                    | 121.3                                 | 22.4                                  | -3.5                     | 63.6 |      |
|               |                    |          |          |      | 20                                    | 29.8                                  | -5.4                     | 82.2                                  | 8.3                                   | -0.4                     | 34.1 |      |
|               |                    | 500      | 6        | 71.7 | -41.8                                 | 167.3                                 | 26.3                     | -5.6                                  | 72.5                                  |                          |      |      |
|               |                    |          | 10       | 52.2 | -14.0                                 | 120.2                                 | 14.4                     | -1.1                                  | 48.4                                  |                          |      |      |
|               |                    |          | 20       | 33.3 | -6.1                                  | 86.1                                  | 5.8                      | 1.1                                   | 25.3                                  |                          |      |      |
|               |                    |          | 1000     | 6    | 67.2                                  | -37.2                                 | 161.0                    | 18.2                                  | -2.9                                  | 58.3                     |      |      |
|               |                    |          |          | 10   | 52.2                                  | -16.5                                 | 120.2                    | 10.2                                  | -0.4                                  | 39.0                     |      |      |
|               |                    |          |          | 20   | 32.6                                  | -7.4                                  | 85.4                     | 3.2                                   | 0.9                                   | 16.5                     |      |      |
|               |                    | 100      | 100      | 6    | 57.2                                  | -26.5                                 | 137.8                    | 35.1                                  | -8.1                                  | 86.0                     |      |      |
|               |                    |          |          | 10   | 39.2                                  | -8.5                                  | 98.4                     | 23.2                                  | -4.1                                  | 66.1                     |      |      |
|               |                    |          |          | 20   | 15.0                                  | -1.5                                  | 56.0                     | 8.2                                   | -0.1                                  | 35.1                     |      |      |
|               |                    |          |          | 200  | 6                                     | 56.7                                  | -29.0                    | 138.8                                 | 28.5                                  | -5.4                     | 75.7 |      |
|               |                    |          |          |      | 10                                    | 38.5                                  | -10.1                    | 96.6                                  | 16.0                                  | -1.6                     | 52.6 |      |
|               |                    |          |          |      | 20                                    | 18.7                                  | -1.8                     | 61.2                                  | 5.4                                   | 0.9                      | 25.4 |      |
|               |                    |          | 500      | 6    | 57.1                                  | -28.8                                 | 141.4                    | 21.0                                  | -3.1                                  | 61.6                     |      |      |
|               |                    |          |          | 10   | 37.4                                  | -10.7                                 | 96.3                     | 12.1                                  | -0.9                                  | 44.2                     |      |      |
|               |                    |          |          | 20   | 18.2                                  | -1.6                                  | 60.2                     | 3.6                                   | 1.3                                   | 17.0                     |      |      |
|               |                    |          |          | 1000 | 6                                     | 56.4                                  | -28.3                    | 139.1                                 | 16.0                                  | -2.0                     | 53.0 |      |
|               |                    |          |          |      | 10                                    | 40.7                                  | -7.3                     | 98.3                                  | 7.5                                   | 0.4                      | 31.3 |      |
|               |                    |          |          |      | 20                                    | 18.2                                  | -3.6                     | 61.5                                  | 3.2                                   | 0.8                      | 15.8 |      |
|               |                    |          | 200      | 100  | 6                                     | 45.4                                  | -17.8                    | 116.3                                 | 27.4                                  | -5.9                     | 75.7 |      |
|               |                    |          |          |      | 10                                    | 26.6                                  | -3.9                     | 76.6                                  | 14.1                                  | -1.4                     | 50.0 |      |
|               |                    |          |          |      | 20                                    | 9.6                                   | -0.1                     | 41.2                                  | 5.0                                   | 0.5                      | 25.2 |      |
|               |                    |          |          |      | 200                                   | 6                                     | 43.9                     | -18.5                                 | 116.2                                 | 21.7                     | -2.5 | 64.2 |
|               |                    |          |          |      |                                       | 10                                    | 25.3                     | -3.6                                  | 73.8                                  | 11.4                     | -0.3 | 43.1 |
|               |                    |          |          |      |                                       | 20                                    | 8.7                      | 0.5                                   | 39.4                                  | 4.2                      | 1.0  | 21.0 |
|               |                    | 500      |          | 6    | 44.7                                  | -15.6                                 | 114.9                    | 15.6                                  | -0.5                                  | 51.9                     |      |      |
|               |                    |          |          | 10   | 25.4                                  | -4.5                                  | 74.8                     | 7.5                                   | 0.4                                   | 31.8                     |      |      |
|               |                    |          |          | 20   | 6.9                                   | 0.5                                   | 35.4                     | 2.9                                   | 1.2                                   | 15.4                     |      |      |
|               |                    |          |          | 1000 | 6                                     | 45.6                                  | -16.6                    | 115.7                                 | 12.3                                  | -0.6                     | 44.7 |      |
|               |                    |          |          |      | 10                                    | 27.7                                  | -3.8                     | 77.7                                  | 5.1                                   | 0.9                      | 23.7 |      |
|               |                    |          |          |      | 20                                    | 7.8                                   | -0.3                     | 37.6                                  | 2.2                                   | 1.1                      | 10.8 |      |

| Table A.8: continued |                    |          |          |            |                                       |                                       |                          |                                       |                                       |                          |       |       |       |       |
|----------------------|--------------------|----------|----------|------------|---------------------------------------|---------------------------------------|--------------------------|---------------------------------------|---------------------------------------|--------------------------|-------|-------|-------|-------|
| $e^{\beta^*}$        | $\mathbf{x}^{opt}$ | $n_{1j}$ | $n_{2j}$ | $J$        | Stage 1                               |                                       |                          | Stage 2                               |                                       |                          |       |       |       |       |
|                      |                    |          |          |            | Bias <sub>1</sub><br>( $\times 100$ ) | Bias <sub>2</sub><br>( $\times 100$ ) | RMSE<br>( $\times 100$ ) | Bias <sub>1</sub><br>( $\times 100$ ) | Bias <sub>2</sub><br>( $\times 100$ ) | RMSE<br>( $\times 100$ ) |       |       |       |       |
| (1.2, 1.5)           | (1.9, 4.6)         | 50       | 100      | 6          | -61.9                                 | -98.7                                 | 214.2                    | -40.0                                 | -8.0                                  | 108.8                    |       |       |       |       |
|                      |                    |          |          | 10         | -52.2                                 | -41.0                                 | 145.3                    | -26.8                                 | -1.1                                  | 83.8                     |       |       |       |       |
|                      |                    |          |          | 20         | -32.3                                 | -11.0                                 | 96.8                     | -14.0                                 | 1.0                                   | 61.1                     |       |       |       |       |
|                      |                    |          |          | 200        | 6                                     | -63.9                                 | -94.1                    | 209.3                                 | -31.3                                 | -3.1                     | 93.5  |       |       |       |
|                      |                    |          |          |            | 10                                    | -48.6                                 | -37.6                    | 140.7                                 | -20.0                                 | 0.8                      | 73.2  |       |       |       |
|                      |                    |          |          |            | 20                                    | -33.5                                 | -11.9                    | 98.1                                  | -8.2                                  | 0.3                      | 49.2  |       |       |       |
|                      |                    |          | 500      | 6          | -69.3                                 | -98.2                                 | 214.8                    | -24.5                                 | -1.5                                  | 83.9                     |       |       |       |       |
|                      |                    |          |          | 10         | -49.4                                 | -39.4                                 | 140.7                    | -12.7                                 | 0.3                                   | 58.8                     |       |       |       |       |
|                      |                    |          |          | 20         | -33.9                                 | -12.2                                 | 99.5                     | -4.2                                  | -0.0                                  | 38.3                     |       |       |       |       |
|                      |                    |          |          | 1000       | 6                                     | -63.2                                 | -100.6                   | 214.9                                 | -17.0                                 | -0.3                     | 70.3  |       |       |       |
|                      |                    |          |          |            | 10                                    | -47.2                                 | -40.0                    | 142.4                                 | -6.3                                  | 1.1                      | 45.1  |       |       |       |
|                      |                    |          |          |            | 20                                    | -32.1                                 | -14.5                    | 98.1                                  | 0.7                                   | -1.7                     | 23.7  |       |       |       |
|                      |                    | 100      | 100      | 6          | 6                                     | -55.4                                 | -67.7                    | 182.0                                 | -32.1                                 | -5.0                     | 95.4  |       |       |       |
|                      |                    |          |          |            | 10                                    | -40.6                                 | -21.5                    | 114.1                                 | -18.6                                 | -0.5                     | 71.1  |       |       |       |
|                      |                    |          |          |            | 20                                    | -22.1                                 | -5.7                     | 78.7                                  | -5.8                                  | 0.0                      | 45.8  |       |       |       |
|                      |                    |          |          | 200        | 6                                     | -55.8                                 | -64.2                    | 175.6                                 | -24.6                                 | -2.5                     | 82.4  |       |       |       |
|                      |                    |          |          |            | 10                                    | -37.1                                 | -18.4                    | 110.8                                 | -16.5                                 | 1.2                      | 65.4  |       |       |       |
|                      |                    |          |          |            | 20                                    | -22.9                                 | -5.3                     | 79.9                                  | -4.3                                  | -1.1                     | 40.4  |       |       |       |
|                      |                    |          | 500      | 6          | 6                                     | -57.8                                 | -64.8                    | 178.5                                 | -19.3                                 | 0.9                      | 72.3  |       |       |       |
|                      |                    |          |          |            | 10                                    | -38.3                                 | -18.3                    | 114.9                                 | -7.7                                  | 1.0                      | 48.6  |       |       |       |
|                      |                    |          |          |            | 20                                    | -23.0                                 | -5.7                     | 80.0                                  | -0.4                                  | -1.3                     | 29.1  |       |       |       |
|                      |                    |          |          | 1000       | 6                                     | -53.1                                 | -65.1                    | 177.9                                 | -11.4                                 | -1.1                     | 62.0  |       |       |       |
|                      |                    |          |          |            | 10                                    | -35.9                                 | -20.0                    | 111.1                                 | -3.2                                  | -0.3                     | 38.4  |       |       |       |
|                      |                    |          |          |            | 20                                    | -20.7                                 | -6.7                     | 77.4                                  | 1.7                                   | -1.6                     | 19.2  |       |       |       |
|                      |                    |          | 200      | 100        | 6                                     | 6                                     | -44.4                    | -34.4                                 | 139.8                                 | -21.8                    | -3.2  | 80.7  |       |       |
|                      |                    |          |          |            |                                       | 10                                    | -25.7                    | -8.7                                  | 89.2                                  | -13.3                    | -0.4  | 61.7  |       |       |
|                      |                    |          |          |            |                                       | 20                                    | -9.8                     | -1.4                                  | 57.0                                  | -2.2                     | -0.1  | 36.6  |       |       |
|                      |                    |          |          |            | 200                                   | 6                                     | -45.7                    | -35.9                                 | 142.6                                 | -19.4                    | -0.2  | 73.2  |       |       |
|                      |                    |          |          |            |                                       | 10                                    | -24.5                    | -8.4                                  | 87.1                                  | -8.3                     | -0.8  | 51.2  |       |       |
|                      |                    |          |          |            |                                       | 20                                    | -11.0                    | -2.2                                  | 58.8                                  | -1.5                     | -1.9  | 33.4  |       |       |
|                      |                    |          |          | 500        | 6                                     | 6                                     | -44.3                    | -33.7                                 | 140.6                                 | -15.7                    | 1.6   | 63.7  |       |       |
|                      |                    |          |          |            |                                       | 10                                    | -27.8                    | -8.5                                  | 89.4                                  | -5.7                     | 0.0   | 43.2  |       |       |
|                      |                    |          |          |            |                                       | 20                                    | -9.2                     | -3.7                                  | 56.3                                  | 0.4                      | -1.9  | 26.5  |       |       |
|                      |                    |          |          |            | 1000                                  | 6                                     | -47.1                    | -39.6                                 | 148.8                                 | -11.7                    | 0.3   | 55.4  |       |       |
|                      |                    |          |          |            |                                       | 10                                    | -26.2                    | -10.6                                 | 90.2                                  | -2.8                     | -0.6  | 35.2  |       |       |
|                      |                    |          |          |            |                                       | 20                                    | -10.4                    | -2.8                                  | 58.5                                  | 2.5                      | -2.4  | 15.5  |       |       |
|                      |                    | (1.2, 2) |          | (1.8, 2.7) | 50                                    | 100                                   | 6                        | -77.8                                 | -35.5                                 | 164.7                    | -74.0 | 4.5   | 125.7 |       |
|                      |                    |          |          |            |                                       |                                       | 10                       | -71.6                                 | -4.6                                  | 133.8                    | -67.7 | 8.0   | 116.6 |       |
|                      |                    |          |          |            |                                       |                                       | 20                       | -65.0                                 | 4.5                                   | 116.8                    | -59.7 | 10.1  | 107.9 |       |
|                      |                    |          |          |            |                                       |                                       | 200                      | 6                                     | -80.3                                 | -27.6                    | 161.0 | -74.0 | 6.5   | 124.2 |
|                      |                    |          |          |            |                                       |                                       |                          | 10                                    | -70.5                                 | -5.2                     | 132.8 | -67.7 | 10.0  | 115.0 |
|                      |                    |          |          |            |                                       |                                       |                          | 20                                    | -64.0                                 | 3.2                      | 116.0 | -55.7 | 9.8   | 103.3 |
|                      |                    |          | 500      |            |                                       | 6                                     | 6                        | -76.1                                 | -29.4                                 | 162.0                    | -65.4 | 7.3   | 115.9 |       |
|                      |                    |          |          |            |                                       |                                       | 10                       | -68.6                                 | -6.2                                  | 131.2                    | -59.3 | 9.9   | 106.9 |       |
|                      |                    |          |          |            |                                       |                                       | 20                       | -63.2                                 | 2.8                                   | 116.0                    | -50.2 | 10.1  | 97.1  |       |
|                      |                    |          |          |            |                                       | 1000                                  | 6                        | -78.6                                 | -27.1                                 | 162.6                    | -62.7 | 8.9   | 111.6 |       |
|                      |                    |          |          |            |                                       |                                       | 10                       | -70.8                                 | -6.8                                  | 134.2                    | -56.2 | 10.5  | 104.1 |       |
|                      |                    |          |          |            |                                       |                                       | 20                       | -62.7                                 | 3.3                                   | 115.0                    | -42.3 | 9.2   | 89.0  |       |
| 100                  | 100                |          | 6        |            | 6                                     | -74.1                                 | -16.9                    | 146.2                                 | -69.1                                 | 7.1                      | 119.5 |       |       |       |
|                      |                    |          |          |            | 10                                    | -65.6                                 | 2.6                      | 121.2                                 | -62.3                                 | 9.0                      | 111.3 |       |       |       |
|                      |                    |          |          |            | 20                                    | -54.6                                 | 5.3                      | 104.6                                 | -48.6                                 | 8.5                      | 97.8  |       |       |       |
|                      |                    |          | 200      |            | 6                                     | -72.0                                 | -16.3                    | 146.4                                 | -62.2                                 | 6.5                      | 113.5 |       |       |       |
|                      |                    |          |          |            | 10                                    | -69.1                                 | 1.5                      | 122.7                                 | -60.4                                 | 9.9                      | 108.7 |       |       |       |
|                      |                    |          |          |            | 20                                    | -55.9                                 | 4.6                      | 105.5                                 | -45.5                                 | 8.2                      | 93.5  |       |       |       |
|                      | 500                |          | 6        |            | 6                                     | -73.2                                 | -17.5                    | 147.6                                 | -65.4                                 | 8.9                      | 114.5 |       |       |       |
|                      |                    |          |          |            | 10                                    | -63.1                                 | 1.6                      | 120.4                                 | -53.5                                 | 9.4                      | 101.6 |       |       |       |
|                      |                    |          |          |            | 20                                    | -57.7                                 | 5.9                      | 107.1                                 | -45.5                                 | 9.5                      | 92.0  |       |       |       |
|                      |                    |          | 1000     |            | 6                                     | -70.7                                 | -14.5                    | 141.8                                 | -58.1                                 | 8.8                      | 107.3 |       |       |       |
|                      |                    |          |          |            | 10                                    | -67.9                                 | 2.3                      | 122.6                                 | -50.9                                 | 10.2                     | 98.7  |       |       |       |
|                      |                    |          |          |            | 20                                    | -58.1                                 | 6.4                      | 107.0                                 | -34.6                                 | 7.5                      | 81.6  |       |       |       |
|                      | 200                |          | 100      |            | 6                                     | 6                                     | -68.3                    | -9.2                                  | 132.7                                 | -63.4                    | 5.4   | 113.2 |       |       |
|                      |                    |          |          |            |                                       | 10                                    | -58.6                    | 5.0                                   | 110.1                                 | -52.0                    | 8.4   | 101.3 |       |       |
|                      |                    |          |          |            |                                       | 20                                    | -49.2                    | 6.8                                   | 97.0                                  | -42.4                    | 7.7   | 89.9  |       |       |
|                      |                    |          |          |            | 200                                   | 6                                     | -66.4                    | -7.7                                  | 130.7                                 | -59.0                    | 7.0   | 109.0 |       |       |
|                      |                    |          |          |            |                                       | 10                                    | -59.4                    | 5.7                                   | 109.7                                 | -51.2                    | 8.7   | 99.8  |       |       |
|                      |                    |          |          |            |                                       | 20                                    | -49.4                    | 7.0                                   | 97.9                                  | -42.1                    | 8.7   | 89.1  |       |       |
| 500                  |                    | 6        | 6        | -67.5      | -7.5                                  | 131.3                                 | -55.1                    | 8.7                                   | 104.6                                 |                          |       |       |       |       |
|                      |                    |          | 10       | -57.4      | 4.5                                   | 109.5                                 | -50.2                    | 9.8                                   | 97.5                                  |                          |       |       |       |       |
|                      |                    |          | 20       | -48.6      | 7.3                                   | 97.0                                  | -37.8                    | 8.3                                   | 84.6                                  |                          |       |       |       |       |
|                      |                    | 1000     | 6        | -68.2      | -8.4                                  | 132.3                                 | -54.4                    | 9.4                                   | 102.2                                 |                          |       |       |       |       |
|                      |                    |          | 10       | -63.2      | 6.1                                   | 113.6                                 | -48.4                    | 9.6                                   | 95.3                                  |                          |       |       |       |       |
|                      |                    |          | 20       | -47.9      | 6.1                                   | 96.3                                  | -29.2                    | 6.8                                   | 74.8                                  |                          |       |       |       |       |

Table A9: Simulation results for estimated optimal package , under nonlinear cost function  $C(\mathbf{x}) = x_1 + 5x_2 + 3\exp(-0.5x_2)$ . Analogue of Table 3 in the main paper and Table A4. Results include empirical 2.5% and 97.5% quantiles of true success rate of second-stage recommended intervention (PrOpt1) and final estimated optimal intervention (PrOpt2), coverage rate of 95% confidence set for optimal intervention package (SetCP95), and its relative size (SetPerc%). Results also include the coverage rate of 95% confidence bands for outcome probability under all values on a grid of  $\mathcal{X}$  (BandsCP95) and the ratio between the mean cost of the estimated optimal intervention and the cost of the optimal true intervention (RelCost).

| $e^{\beta^*}$ | $\mathbf{x}^{opt}$ | $n_{1j}$ | $n_{2j}$ | $J$         | PrOpt1<br>(Q2.5,Q97.5) | PrOpt2<br>(Q2.5,Q97.5) | SetCP95     | SetPerc% | BandsCP95 | RelCost |       |
|---------------|--------------------|----------|----------|-------------|------------------------|------------------------|-------------|----------|-----------|---------|-------|
| (1, 2)        | (0, 3.2)           | 50       | 100      | 6           | (50.0,97.0)            | (83.1,93.7)            | 93.0        | 29.5     | 96.0      | 99.8    |       |
|               |                    |          |          | 10          | (78.9,96)              | (85.8,92.4)            | 93.2        | 20.6     | 95.8      | 100.4   |       |
|               |                    |          |          | 20          | (84.1,94.1)            | (87.4,91.9)            | 93.6        | 13.5     | 95.6      | 100.6   |       |
|               |                    |          |          | 200         | 6                      | (50.0,97.0)            | (84.1,92.9) | 92.8     | 24.3      | 95.4    | 99.9  |
|               |                    |          |          |             | 10                     | (78.8,96.0)            | (86.7,92.4) | 94.0     | 16.6      | 95.2    | 100.4 |
|               |                    |          |          |             | 20                     | (84.1,94.5)            | (88.2,91.9) | 93.2     | 10.8      | 95.5    | 100.4 |
|               |                    | 500      | 6        | (50.0,97.0) | (85.0,92.4)            | 92.7                   | 19.1        | 95.5     | 100.0     |         |       |
|               |                    |          | 10       | (77.7,96.0) | (87.4,91.9)            | 93.3                   | 12.6        | 95.8     | 100.6     |         |       |
|               |                    |          | 20       | (84.1,93.7) | (88.9,91.3)            | 92.0                   | 8.0         | 94.8     | 100.7     |         |       |
|               |                    |          | 1000     | 6           | (50.0,97.0)            | (86.7,91.9)            | 93.3        | 15.5     | 96.2      | 100.3   |       |
|               |                    |          |          | 10          | (77.7,96.5)            | (88.2,91.3)            | 93.9        | 9.9      | 96.2      | 100.5   |       |
|               |                    |          |          | 20          | (84.1,94.1)            | (89.6,90.8)            | 91.4        | 6.2      | 95.9      | 100.5   |       |
|               |                    | 100      | 100      | 6           | (53.4,97.0)            | (84.1,93.3)            | 92.8        | 24.6     | 95.0      | 99.9    |       |
|               |                    |          |          | 10          | (82.1,95.2)            | (86.7,92.4)            | 92.7        | 17.4     | 94.4      | 100.3   |       |
|               |                    |          |          | 20          | (85.8,93.3)            | (88.2,91.9)            | 93.9        | 11.4     | 94.6      | 100.5   |       |
|               |                    |          |          | 200         | 6                      | (50.0,96.3)            | (85.8,92.9) | 93.8     | 20.9      | 96.6    | 100.2 |
|               |                    |          |          |             | 10                     | (82.1,94.5)            | (87.4,91.9) | 94.2     | 14.2      | 95.4    | 100.5 |
|               |                    |          |          |             | 20                     | (85.8,93.3)            | (88.9,91.9) | 94.2     | 9.4       | 94.6    | 100.6 |
|               |                    |          | 500      | 6           | (50.0,96.8)            | (86.7,91.9)            | 94.4        | 16.2     | 95.6      | 100.4   |       |
|               |                    |          |          | 10          | (81.1,94.5)            | (88.2,91.9)            | 93.6        | 10.8     | 95.4      | 100.5   |       |
|               |                    |          |          | 20          | (86.6,93.3)            | (89.6,91.3)            | 94.2        | 7.1      | 95.7      | 100.6   |       |
|               |                    |          |          | 1000        | 6                      | (50.0,96.8)            | (86.7,91.9) | 93.6     | 13.0      | 95.6    | 100.4 |
|               |                    |          |          |             | 10                     | (83.1,94.8)            | (88.9,91.3) | 92.3     | 8.7       | 95.2    | 100.6 |
|               |                    |          |          |             | 20                     | (85.8,93.3)            | (89.6,90.8) | 90.4     | 5.6       | 96.5    | 100.4 |
|               |                    | 200      | 100      | 6           | (69.7,96.0)            | (85.8,92.9)            | 93.7        | 21.0     | 95.1      | 100.0   |       |
|               |                    |          |          | 10          | (85.0,93.7)            | (87.4,92.4)            | 92.9        | 14.5     | 94.9      | 100.5   |       |
|               |                    |          |          | 20          | (87.4,92.4)            | (88.9,91.9)            | 94.2        | 9.6      | 96.0      | 100.4   |       |
|               |                    |          |          | 200         | 6                      | (68.2,95.5)            | (86.7,92.4) | 93.4     | 17.5      | 95.2    | 100.6 |
|               |                    |          |          |             | 10                     | (85.0,93.3)            | (88.2,91.9) | 94.0     | 12.1      | 95.4    | 100.6 |
|               |                    |          |          |             | 20                     | (87.4,92.9)            | (88.9,91.3) | 92.6     | 8.1       | 94.9    | 100.6 |
|               |                    |          | 500      | 6           | (73.9,95.8)            | (87.4,91.9)            | 95.1        | 13.6     | 95.4      | 100.8   |       |
|               |                    |          |          | 10          | (85.0,93.7)            | (88.9,91.3)            | 93.2        | 9.3      | 95.1      | 100.6   |       |
|               |                    |          |          | 20          | (87.4,92.4)            | (89.6,91.3)            | 91.8        | 6.2      | 95.4      | 100.5   |       |
|               |                    |          |          | 1000        | 6                      | (72.5,95.5)            | (88.2,91.9) | 92.9     | 11.1      | 95.4    | 100.6 |
|               |                    |          |          |             | 10                     | (85.0,93.3)            | (88.9,91.3) | 93.1     | 7.6       | 94.5    | 100.6 |
|               |                    |          |          |             | 20                     | (87.4,92.4)            | (89.6,90.8) | 91.1     | 5.0       | 95.6    | 100.4 |

| Table A.9: continued |                    |          |            |     |                        |                        |             |             |           |         |      |       |
|----------------------|--------------------|----------|------------|-----|------------------------|------------------------|-------------|-------------|-----------|---------|------|-------|
| $e^{\beta^*}$        | $\mathbf{x}^{opt}$ | $n_{1j}$ | $n_{2j}$   | $J$ | PrOpt1<br>(Q2.5,Q97.5) | PrOpt2<br>(Q2.5,Q97.5) | SetCP95     | SetPerc%    | BandsCP95 | RelCost |      |       |
| (1.2, 1.5)           | (1.9, 4.6)         | 50       | 100        | 6   | (56.3,91.6)            | (82.4,91.6)            | 94.3        | 27.4        | 95.2      | 97.0    |      |       |
|                      |                    |          |            | 10  | (71.8,91.6)            | (85.6,91.6)            | 93.6        | 19.2        | 95.1      | 98.8    |      |       |
|                      |                    |          |            | 20  | (81.8,91.6)            | (87.1,91.6)            | 94.4        | 13.1        | 94.8      | 99.7    |      |       |
|                      |                    |          | 200        | 6   | (57.2,91.6)            | (84.1,91.6)            | 95.2        | 23.0        | 95.0      | 98.2    |      |       |
|                      |                    |          |            | 10  | (72.6,91.6)            | (87.0,91.6)            | 95.6        | 15.6        | 96.4      | 99.4    |      |       |
|                      |                    |          |            | 20  | (81.8,91.6)            | (87.9,91.6)            | 95.0        | 10.4        | 95.4      | 99.7    |      |       |
|                      |                    |          | 500        | 6   | (56.8,91.6)            | (85.1,91.6)            | 95.1        | 18.7        | 94.7      | 98.8    |      |       |
|                      |                    |          |            | 10  | (71.8,91.6)            | (87.1,91.6)            | 95.2        | 11.7        | 96.0      | 99.6    |      |       |
|                      |                    |          |            | 20  | (82.4,91.6)            | (88.5,91.3)            | 94.5        | 7.4         | 94.9      | 99.8    |      |       |
|                      |                    |          | 1000       | 6   | (56.8,91.6)            | (86.4,91.6)            | 95.0        | 15.1        | 95.0      | 99.3    |      |       |
|                      |                    |          |            | 10  | (71.7,91.6)            | (88.1,91.6)            | 94.8        | 9.1         | 95.7      | 100.0   |      |       |
|                      |                    |          |            | 20  | (81.8,91.6)            | (89.2,91.0)            | 93.6        | 5.5         | 94.8      | 99.7    |      |       |
|                      |                    | 100      | 100        | 6   | (59.0,91.6)            | (84.1,91.6)            | 95.0        | 23.8        | 95.9      | 97.8    |      |       |
|                      |                    |          |            | 10  | (79.2,91.6)            | (86.6,91.6)            | 94.0        | 17.1        | 95.0      | 99.2    |      |       |
|                      |                    |          |            | 20  | (84.1,91.6)            | (87.9,91.6)            | 94.2        | 12.0        | 95.4      | 99.8    |      |       |
|                      |                    |          | 200        | 6   | (59.0,91.6)            | (85.1,91.6)            | 94.4        | 20.0        | 95.6      | 98.6    |      |       |
|                      |                    |          |            | 10  | (79.6,91.6)            | (87.1,91.6)            | 95.1        | 13.9        | 95.6      | 99.6    |      |       |
|                      |                    |          |            | 20  | (84.1,91.6)            | (88.3,91.5)            | 94.4        | 9.7         | 95.9      | 99.6    |      |       |
|                      |                    |          | 500        | 6   | (59.0,91.6)            | (86.1,91.6)            | 94.8        | 15.7        | 94.8      | 99.4    |      |       |
|                      |                    |          |            | 10  | (79.2,91.6)            | (87.9,91.6)            | 94.6        | 10.4        | 95.0      | 99.9    |      |       |
|                      |                    |          |            | 20  | (84.3,91.6)            | (89.0,91.2)            | 94.0        | 6.9         | 95.4      | 99.7    |      |       |
|                      |                    |          | 1000       | 6   | (59.0,91.6)            | (87.0,91.6)            | 95.0        | 13.4        | 95.1      | 99.4    |      |       |
|                      |                    |          |            | 10  | (79.2,91.6)            | (88.4,91.5)            | 94.2        | 8.1         | 95.8      | 99.8    |      |       |
|                      |                    |          |            | 20  | (84.1,91.6)            | (89.4,90.8)            | 93.8        | 5.1         | 95.7      | 99.8    |      |       |
|                      |                    | 200      | 100        | 6   | (64.8,91.6)            | (85.1,91.6)            | 94.0        | 20.4        | 95.6      | 98.5    |      |       |
|                      |                    |          |            | 10  | (81.8,91.6)            | (86.6,91.6)            | 94.4        | 15.2        | 95.3      | 99.4    |      |       |
|                      |                    |          |            | 20  | (86.1,91.6)            | (88.3,91.6)            | 94.9        | 10.7        | 95.8      | 99.9    |      |       |
|                      |                    |          | 200        | 6   | (59.0,91.6)            | (85.6,91.6)            | 95.0        | 17.3        | 95.2      | 99.2    |      |       |
|                      |                    |          |            | 10  | (82.4,91.6)            | (87.7,91.6)            | 93.8        | 12.7        | 96.2      | 99.5    |      |       |
|                      |                    |          |            | 20  | (86.3,91.6)            | (88.6,91.3)            | 93.8        | 9.0         | 94.8      | 99.6    |      |       |
|                      |                    |          | 500        | 6   | (59.0,91.6)            | (87.1,91.6)            | 94.2        | 13.4        | 94.2      | 99.7    |      |       |
|                      |                    |          |            | 10  | (82.4,91.6)            | (88.3,91.6)            | 94.4        | 9.4         | 94.8      | 99.8    |      |       |
|                      |                    |          |            | 20  | (86.3,91.6)            | (89.2,91.0)            | 93.8        | 6.5         | 95.0      | 99.6    |      |       |
|                      |                    |          | 1000       | 6   | (59.0,91.6)            | (87.3,91.6)            | 95.2        | 11.5        | 96.3      | 99.6    |      |       |
|                      |                    |          |            | 10  | (82.2,91.6)            | (88.6,91.2)            | 94.6        | 7.5         | 95.6      | 99.8    |      |       |
|                      |                    |          |            | 20  | (86.1,91.6)            | (89.4,90.8)            | 91.6        | 4.9         | 94.6      | 99.6    |      |       |
|                      |                    | (1.2, 2) | (1.8, 2.7) | 50  | 100                    | 6                      | (55.9,97.0) | (82.4,93.3) | 94.8      | 30.8    | 95.5 | 96.8  |
|                      |                    |          |            |     |                        | 10                     | (76.8,95.3) | (85.8,92.0) | 95.5      | 21.3    | 95.6 | 98.1  |
|                      |                    |          |            |     |                        | 20                     | (84.1,93.4) | (87.4,91.5) | 95.6      | 14.3    | 95.2 | 99.2  |
|                      |                    |          |            |     | 200                    | 6                      | (57.2,96.8) | (84.1,92.5) | 94.8      | 25.5    | 95.8 | 97.4  |
|                      |                    |          |            |     |                        | 10                     | (78.0,95.3) | (86.7,91.7) | 95.2      | 17.4    | 94.6 | 98.7  |
|                      |                    |          |            |     |                        | 20                     | (83.1,93.3) | (87.8,91.2) | 94.2      | 11.3    | 95.4 | 99.4  |
|                      |                    |          |            |     | 500                    | 6                      | (56.8,97.0) | (85.1,92.0) | 94.4      | 19.9    | 95.0 | 98.1  |
|                      |                    |          |            |     |                        | 10                     | (76.5,94.9) | (87.4,91.2) | 96.0      | 12.9    | 95.5 | 99.2  |
|                      |                    |          |            |     |                        | 20                     | (83.4,93.3) | (88.6,90.8) | 95.6      | 8.0     | 95.2 | 99.8  |
|                      |                    |          |            |     | 1000                   | 6                      | (56.3,97.9) | (85.8,91.3) | 95.8      | 16.3    | 96.4 | 98.7  |
|                      |                    |          |            |     |                        | 10                     | (75.2,95.2) | (87.6,90.9) | 94.2      | 10.1    | 94.8 | 99.6  |
|                      |                    |          |            |     |                        | 20                     | (83.6,93.4) | (88.9,90.7) | 95.1      | 6.0     | 95.1 | 100.0 |
| 100                  | 100                |          |            | 6   | (58.1,95.7)            | (84.3,92.7)            | 94.9        | 25.8        | 95.6      | 97.8    |      |       |
|                      |                    |          |            | 10  | (82.1,94.2)            | (86.7,91.9)            | 94.0        | 18.3        | 94.6      | 98.7    |      |       |
|                      |                    |          |            | 20  | (85.8,92.4)            | (87.6,91.3)            | 95.0        | 12.3        | 95.2      | 99.4    |      |       |
|                      | 200                |          |            | 6   | (58.1,96.4)            | (85.8,92.3)            | 95.3        | 22.1        | 95.9      | 98.1    |      |       |
|                      |                    |          |            | 10  | (81.4,93.7)            | (87.4,91.5)            | 95.9        | 15.2        | 95.8      | 99.1    |      |       |
|                      |                    |          |            | 20  | (85.8,92.4)            | (88.2,91.1)            | 95.3        | 10.0        | 95.4      | 99.5    |      |       |
|                      | 500                |          |            | 6   | (59.0,96.1)            | (85.8,91.7)            | 94.8        | 17.1        | 95.4      | 98.5    |      |       |
|                      |                    |          |            | 10  | (81.4,93.8)            | (87.8,91.2)            | 96.0        | 11.3        | 95.5      | 99.4    |      |       |
|                      |                    |          |            | 20  | (85.8,92.5)            | (88.7,90.8)            | 95.4        | 7.3         | 95.2      | 99.9    |      |       |
|                      | 1000               |          |            | 6   | (59.0,95.8)            | (86.7,91.3)            | 95.3        | 13.8        | 94.9      | 98.9    |      |       |
|                      |                    |          |            | 10  | (82.1,93.9)            | (88.2,90.9)            | 95.2        | 8.7         | 94.6      | 99.8    |      |       |
|                      |                    |          |            | 20  | (85.8,92.4)            | (88.9,90.6)            | 94.2        | 5.6         | 94.2      | 100.0   |      |       |
| 200                  | 100                |          |            | 6   | (65.1,94.6)            | (85.2,92.3)            | 94.6        | 21.6        | 95.4      | 97.7    |      |       |
|                      |                    |          |            | 10  | (84.8,92.5)            | (87.4,91.6)            | 96.1        | 15.3        | 95.7      | 99.2    |      |       |
|                      |                    |          |            | 20  | (87.4,91.6)            | (88.2,91.2)            | 95.4        | 10.2        | 95.3      | 99.6    |      |       |
|                      | 200                |          |            | 6   | (69.6,94.8)            | (86.1,91.9)            | 95.2        | 18.4        | 94.8      | 98.4    |      |       |
|                      |                    |          |            | 10  | (85.0,92.9)            | (87.6,91.5)            | 95.4        | 12.9        | 95.2      | 99.3    |      |       |
|                      |                    |          |            | 20  | (86.9,91.7)            | (88.6,91.1)            | 95.3        | 8.7         | 95.4      | 99.9    |      |       |
|                      | 500                |          |            | 6   | (63.5,94.4)            | (86.9,91.4)            | 95.1        | 14.5        | 95.6      | 99.1    |      |       |
|                      |                    |          |            | 10  | (84.1,92.9)            | (88.2,91.1)            | 95.3        | 9.9         | 94.8      | 99.7    |      |       |
|                      |                    |          |            | 20  | (87.4,91.7)            | (88.9,90.8)            | 95.3        | 6.6         | 96.0      | 100.1   |      |       |
|                      | 1000               |          |            | 6   | (59.0,94.2)            | (87.6,91.2)            | 96.2        | 11.8        | 95.6      | 99.4    |      |       |
|                      |                    |          |            | 10  | (85.0,92.9)            | (88.4,90.8)            | 95.4        | 7.8         | 95.8      | 99.8    |      |       |
|                      |                    |          |            | 20  | (86.7,91.6)            | (89.1,90.6)            | 94.6        | 5.1         | 94.4      | 100.1   |      |       |



## 6 Confidence bands for oxytocin administration in the BetterBirth Study

Figure 2 below presents 95% confidence bands for the probability of oxytocin administration in the BetterBirth Study under all possible values of the intervention for a center with average monthly birth rate ( $z = 175$ ). These confidence bands have an asymptotic simultaneous coverage of the probability of oxytocin administration under all intervention values. The figure includes four panels showing the bands from different angles. The middle curve is the estimated probability of oxytocin administration,  $\hat{p}_x(\hat{\beta}; z = 175)$ .

### References

Scheffé, H. (1959). *The analysis of variance*, Volume 72. John Wiley & Sons.

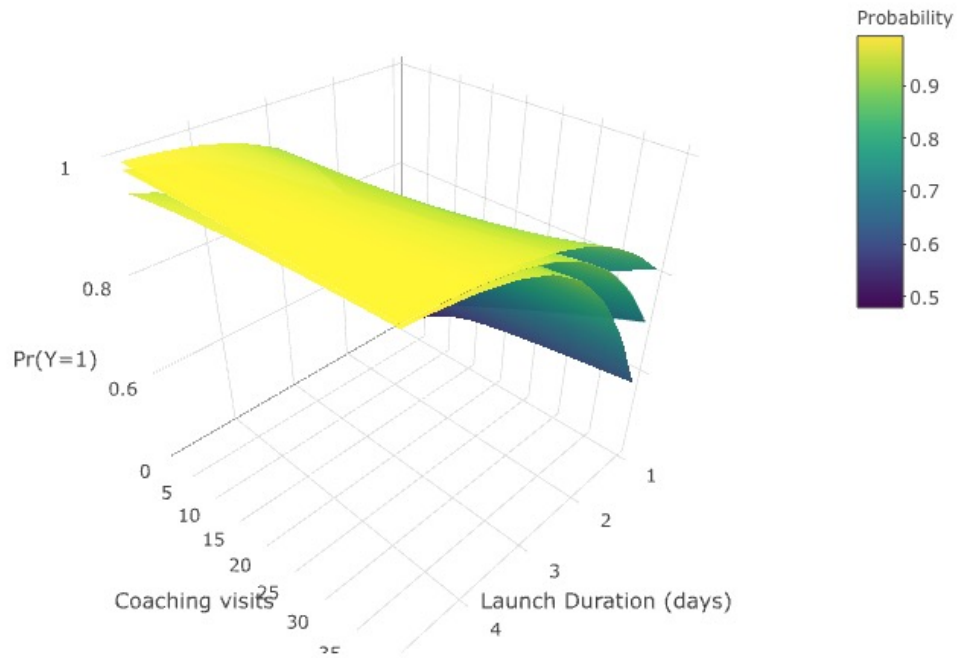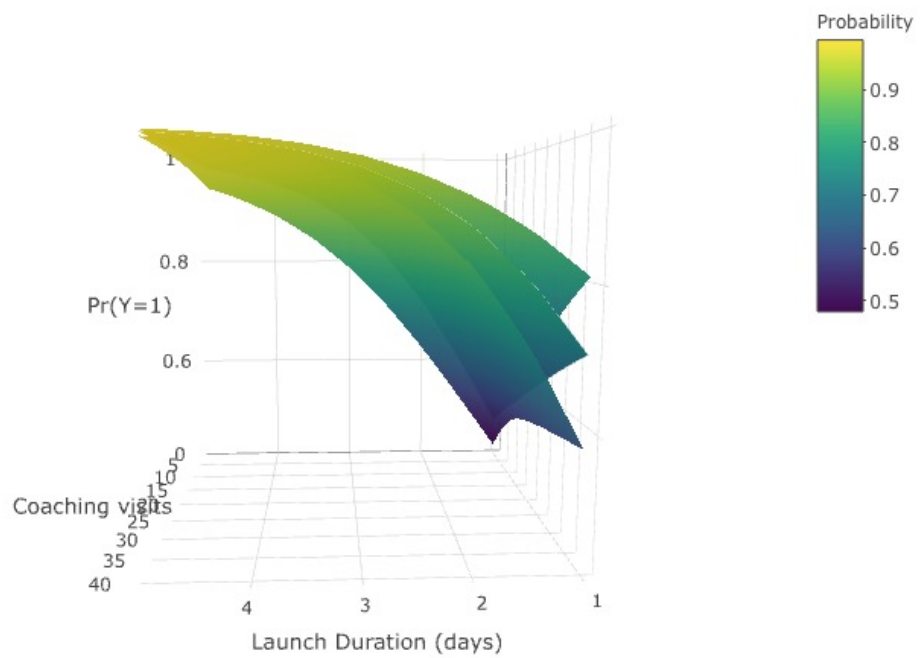

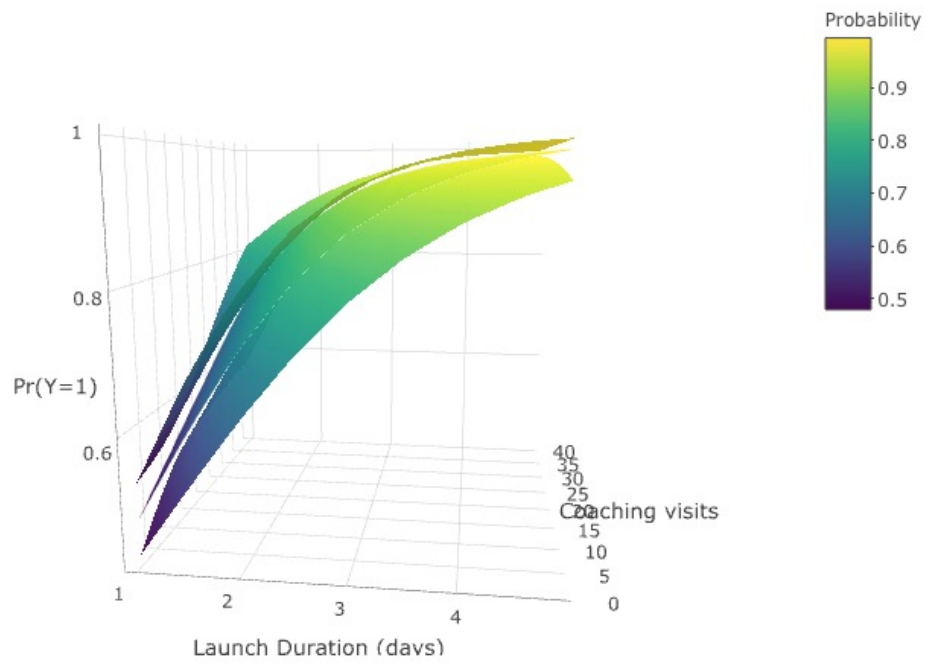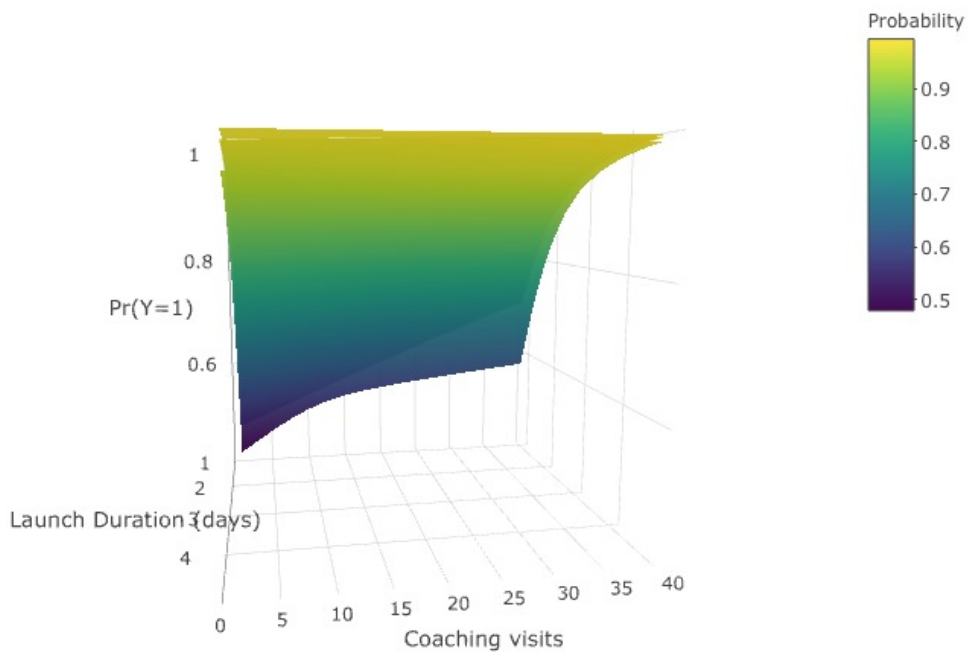

Figure 2: Confidence bands for probability of oxytocin use under various intervention compositions, for a center with average monthly number of births ( $z = 175$ ). All four panels show the same confidence bands, looking from a different angle on the plot. The figure portrays three curves: the middle one is the estimated probability of success and the upper and lower curves are the boundaries of the confidence bands.
